# Supplementary material for: Bruton’s Tyrosine Kinase (BTK) Inhibitors and Autoimmune Diseases: Making Sense of BTK Inhibitor Specificity Profiles and Recent Clinical Trial Successes and Failures
Source: Front Immunol. 2021 Nov 3;12:662223. doi: 10.3389/fimmu.2021.662223 (PMC8595937; doi:10.3389/fimmu.2021.662223)
Supplement: Supplementary Table 1 — Full enrichment excel file. [file Table_1.xlsx]

## Sheet: Maps_dataframe_NEW_Ranked
Map_Name	BTK_MAPS	ITK_MAPS	Tec_MAPS	JAK3_MAPS	bmx_MAPS	EGF_MAPS	TXK_MAPS	SLE_MAPS	RA_MAPS	MS_MAPS	SJ_MAPS	Disease Relationship	# OF TARGETS
Chemotaxis_SDF-1/ CXCR4-induced chemotaxis of immune cells	1	1	0	1	0	0	0	8.28e-08	2.44e-05	0.00301224	0.00241354	data	3
Role of tumor-infiltrating B cells in anti-tumor immunity	1	0	0	1	0	0	0	3.33e-25	4.25e-21	1.55e-16	7.66e-29	data	2
Immune response_NF-AT in immune response	1	1	0	0	0	0	0	5.4e-12	3.25e-07	0.00133955	0.0039497	data	2
Immune response_IL-6 signaling pathway via MEK/ERK and PI3K/AKT cascades	1	0	1	0	0	0	0	2.24e-08	1.16e-07	0.000500615	0.000341798	data	2
Immune response_PIP3 signaling in B lymphocytes	1	0	1	0	0	0	0	0.0141946	0.036832	NA	NA	data	2
Role of B cells in SLE	1	0	0	0	0	0	0	1.39e-28	9.93e-30	2.17e-18	2.97e-26	data	1
SLE genetic marker-specific pathways in B cells	1	0	0	0	0	0	0	2.51e-24	2.66e-14	4.12e-11	6.54e-10	data	1
B cell signaling in hematological malignancies	1	0	0	0	0	0	0	1.55e-18	1.64e-13	8.03e-07	1.15e-08	data	1
Immune response_Fc epsilon RI pathway: Lyn-mediated cytokine production	1	0	0	0	0	0	0	4.65e-18	2.04e-09	5e-05	3.77e-08	data	1
IgE- and MGF-induced Lyn-mediated production of cytokines and arachidonic acid metabolites in lung mast cells in asthma	1	0	0	0	0	0	0	1.47e-17	5.94e-09	8.95e-06	0.000105184	data	1
Immune response_IL-5 signaling via PI3K, MAPK and NF-kB	1	0	0	0	0	0	0	5.41e-12	9.14e-12	0.000170624	0.000418114	data	1
Immune response_B cell antigen receptor (BCR) pathway	1	0	0	0	0	0	0	1.37e-10	6.13e-06	NA	0.000106436	data	1
Immune response_BAFF-induced canonical NF-kB signaling	1	0	0	0	0	0	0	3.88e-07	1.46e-08	0.00172831	3.98e-07	data	1
Cell adhesion_Integrin inside-out signaling in neutrophils	1	0	0	0	0	0	0	1.83e-05	5.68e-05	0.00245179	0.000461229	data	1
Immune response_TLR3 and TLR4 induced TICAM1-specific signaling pathway	1	0	0	0	0	0	0	2.31e-05	4.89e-07	0.0292069	4.38e-05	data	1
Proinflammatory mediators release and arachidonic acid metabolites production in basophils in asthma	1	0	0	0	0	0	0	0.0012123	4.03e-05	0.0102498	0.0272494	data	1
Blood coagulation_GPVI-dependent platelet activation	1	0	0	0	0	0	0	0.00252908	0.0033485	NA	NA	data	1
G-protein signaling_G-Protein alpha-q signaling cascades	1	0	0	0	0	0	0	0.00378468	0.0337918	NA	NA	data	1
Production of reactive oxygen species and arachidonic acid metabolites by neutrophils in asthma	1	0	0	0	0	0	0	0.0150445	0.00118721	0.00972796	0.0157542	data	1
Immune response_IL-6 signaling pathway via JAK/STAT	0	0	1	1	0	0	0	7.26e-25	6.11e-29	5.92e-10	2.25e-12	data	2
T follicular helper cell dysfunction in SLE	0	0	0	1	0	0	0	4.13e-41	2.29e-25	2.72e-26	1.05e-27	data	1
Inflammatory mechanisms of pancreatic cancerogenesis	0	0	0	0	0	1	0	3.21e-40	1.68e-42	3.09e-27	4.84e-36	data	1
Breakdown of CD4+ T cell peripheral tolerance in type 1 diabetes mellitus	0	0	0	1	0	0	0	5.38e-40	3.49e-30	1.75e-23	1.61e-30	data	1
Role of selected IFN-gamma-inducible genes in cancer pathophysiology	0	1	0	0	0	0	0	3.04e-39	4.14e-28	1.17e-10	1.83e-25	data	1
B-regulatory cells and tumor cells intercellular interaction	0	0	0	1	0	0	0	1.03e-38	4.68e-35	3.35e-22	4.84e-36	data	1
Proinflammatory cytokine production by Th17 cells in asthma	0	0	0	1	0	0	0	1.53e-35	1.97e-29	1.23e-19	1.43e-24	data	1
Th17 cells in dry eye	0	0	0	1	0	0	0	1.28e-32	3.58e-25	1.31e-17	1.65e-21	data	1
Inter-cellular relations in COPD (general schema)	0	0	0	0	0	1	0	2.51e-27	2.25e-29	1.17e-14	7.25e-30	data	1
Th17 cells in CF	0	0	0	1	0	0	0	7.61e-25	2.55e-22	8.19e-16	4.99e-20	data	1
Immune response_IL-22 signaling pathway	0	0	0	1	0	0	0	9.69e-25	1.03e-15	9.62e-12	3.19e-14	data	1
Immune response_IL-3 signaling via JAK/STAT, p38, JNK and NF-kB	0	0	0	1	0	0	0	1.04e-24	1.39e-25	7.01e-08	2.01e-16	data	1
Immune response_Generation of memory CD4+ T cells	0	0	0	1	0	0	0	3.69e-24	9.04e-27	6.6e-14	2.5e-18	data	1
CHDI_Correlations from Replication data_Causal network (positive correlations)	0	1	0	0	0	0	0	5.36e-24	2.58e-16	3.53e-09	9.59e-09	data	1
Immune response_ICOS signaling pathway in T-helper cell	0	1	0	0	0	0	0	1.05e-22	5.01e-14	1.45e-13	1.59e-10	data	1
Dysregulation of germinal center response in SLE	0	0	0	1	0	0	0	2.51e-22	9.84e-19	6.87e-17	7.42e-22	data	1
Role of iNKT and B cells in T cell recruitment in allergic contact dermatitis	0	1	0	0	0	0	0	1.22e-21	2.71e-18	1.27e-14	5.87e-15	data	1
Natural killer T cells in dry eye	0	1	0	0	0	0	0	2.85e-21	8.26e-22	4.7e-16	1.73e-15	data	1
Immune response_Th17 cell differentiation	0	0	0	1	0	0	0	1.16e-20	4.06e-16	3.43e-13	2.31e-17	data	1
Treg cells (CD4+CD25+Foxp3+) in dry eye	0	0	0	1	0	0	0	1.01e-19	1.39e-20	3.6e-15	1.92e-21	data	1
Th17 cells in CF (mouse model)	0	0	0	1	0	0	0	4.67e-19	3.71e-18	1.71e-13	2.46e-18	data	1
Immune response_CD40 signaling	0	0	0	1	0	0	0	5.63e-19	9.84e-19	4.55e-09	9.92e-17	data	1
Immune response_IL-2 signaling via JAK/ STAT	0	0	0	1	0	0	0	1.94e-18	6.47e-17	3.12e-06	2.53e-17	data	1
Disruption of apoptosis, proliferation and shedding of epithelial cells in asthma	0	0	0	0	0	1	0	1.54e-17	1.64e-14	1.33e-13	4.99e-20	data	1
EGFR signaling pathway in lung cancer	0	0	0	0	0	1	0	1.05e-16	8.28e-16	9.89e-10	1.58e-12	data	1
Immune response_Differentiation of natural regulatory T cells	0	0	0	1	0	0	0	1.71e-16	7.21e-15	1.07e-09	2.31e-17	data	1
Immune response_TCR alpha/beta signaling pathway	0	1	0	0	0	0	0	1.76e-16	3.39e-09	8.54e-06	5.01e-05	data	1
Proteases and EGFR-activated mucin production in airway epithelium in COPD	0	0	0	0	0	1	0	2.02e-16	1.34e-11	5.06e-05	1.46e-05	data	1
Immune response_NF-AT signaling and leukocyte interactions	0	1	0	0	0	0	0	7.34e-16	4.78e-13	1.17e-07	1.19e-06	data	1
Impaired inhibition of Th17 cell differentiation by IFN-beta in multiple sclerosis	0	0	0	1	0	0	0	2.45e-15	6.41e-14	2.31e-15	8.35e-12	data	1
Regulation of angiogenesis in prostate cancer	0	0	0	0	0	1	0	4.69e-15	8.34e-20	4.45e-09	2.08e-09	data	1
EGFR family signaling in pancreatic cancer	0	0	0	0	0	1	0	6.93e-14	6.19e-12	7.86e-06	3.77e-08	data	1
ERBB family and HGF signaling in gastric cancer	0	0	0	0	0	1	0	2.59e-13	6.77e-10	3.65e-06	4.4e-07	data	1
Main chemotherapy drugs and their action in SCLC cells	0	0	0	0	0	1	0	2.63e-13	8.02e-10	7.26e-05	8.27e-06	data	1
Inhibition of apoptosis in pancreatic cancer	0	0	0	0	0	1	0	3.13e-13	2.58e-13	1.04e-05	1.38e-09	data	1
Immune response_CD28 signaling	0	1	0	0	0	0	0	4.26e-13	6.7e-09	0.0023161	0.00575559	data	1
Ovarian cancer (main signaling cascades)	0	0	0	0	0	1	0	5.37e-13	2.04e-10	0.00726483	0.00012516	data	1
Immune response_IL-9 signaling pathway	0	0	0	1	0	0	0	7.81e-13	1.01e-15	1.1e-08	9.64e-14	data	1
Regulation of Tissue factor signaling in cancer	0	0	0	0	0	1	0	8.13e-13	2.48e-12	2.08e-07	3.55e-08	data	1
Androgen receptor activation and downstream signaling in Prostate cancer	0	0	0	0	0	1	0	9.68e-13	4.01e-14	2.85e-07	5.43e-10	data	1
Main genetic and epigenetic alterations in lung cancer	0	0	0	0	0	1	0	1.19e-12	3.25e-16	1.44e-08	1.19e-06	data	1
Immune response_IL-4 signaling pathway	0	0	0	1	0	0	0	1.42e-12	1.13e-05	8.28e-06	0.00195184	data	1
iNKT cell-keratinocyte interactions in allergic contact dermatitis	0	1	0	0	0	0	0	1.67e-12	2.49e-13	1.34e-10	7.37e-13	data	1
Immune response_IL-15 signaling via JAK-STAT cascade	0	0	0	1	0	0	0	2.07e-12	2.72e-11	8.78e-07	1.3e-07	data	1
Immune response_TNF-R2 signaling pathways	0	0	0	0	1	0	0	2.51e-12	7.45e-11	1.75e-05	5.94e-08	data	1
Hypertrophy of asthmatic airway smooth muscle cells	0	0	0	0	0	1	0	4.1e-12	1.74e-07	5.31e-12	1.49e-08	data	1
Some pathways of EMT in cancer cells	0	0	0	0	0	1	0	5.4e-12	5.61e-08	1.11e-05	1.72e-05	data	1
Anti-apoptotic action of ErbB2 in breast cancer	0	0	0	0	0	1	0	5.4e-12	8.93e-09	1.82e-06	1.72e-05	data	1
G protein-coupled receptors signaling in lung cancer	0	0	0	0	0	1	0	5.41e-12	3.83e-15	5.06e-13	4.53e-14	data	1
Development_EGFR signaling pathway	0	0	0	0	0	1	0	6e-12	1.2e-12	3.84e-06	1.48e-07	data	1
Apoptosis and survival_IL-17-induced CIKS-independent signaling pathways	0	0	0	1	0	0	0	4.22e-11	5.15e-08	0.000615258	7.82e-07	data	1
PI3K signaling in gastric cancer	0	0	0	0	0	1	0	4.84e-11	2.59e-12	1.11e-05	0.000747372	data	1
ErbB2-induced breast cancer cell invasion	0	0	0	0	0	1	0	6.73e-11	7.23e-08	0.000763484	0.00373652	data	1
Disruption of epithelial layer restitution in asthma	0	0	0	0	0	1	0	7.83e-11	9.99e-12	8.23e-09	4.65e-07	data	1
Immune response_IL-2 signaling via ERK, PI3K, and PLC-gamma	0	0	0	1	0	0	0	8.33e-11	3.97e-07	0.000440348	0.00145144	data	1
Development_Prolactin receptor signaling	0	0	1	0	0	0	0	1.15e-10	2.03e-08	8.54e-06	9.4e-07	data	1
Development_Regulation of epithelial-to-mesenchymal transition (EMT)	0	0	0	0	0	1	0	1.56e-10	3.75e-13	3.46e-09	4.04e-08	data	1
Proteases and EGFR-induced mucin synthesis in normal and asthmatic epithelium	0	0	0	0	0	1	0	2.64e-10	6.7e-09	0.000574071	3.24e-05	data	1
Apoptosis and survival_NO synthesis and signaling	0	0	0	1	0	0	0	2.64e-10	1.17e-06	0.0260716	4.41e-06	data	1
Immune response_IL-7 signaling in T lymphocytes	0	0	0	1	0	0	0	4.27e-10	2.56e-06	0.000610142	0.000723669	data	1
Putative role of Estrogen receptor and Androgen receptor signaling in progression of lung cancer	0	0	0	0	0	1	0	8.36e-10	2.8e-06	3.5e-08	0.00162369	data	1
Colorectal cancer (general schema)	0	0	0	0	0	1	0	1.04e-09	6.7e-12	1.97e-06	1.93e-06	data	1
Cigarette smoke-induced proliferation, metaplasia and survival of airway epithelial cells	0	0	0	0	0	1	0	2.07e-09	6.38e-06	0.0161042	0.0163075	data	1
Immune response_CCR5 signaling in macrophages and T lymphocytes	0	0	0	1	0	0	0	5.65e-09	5.84e-07	0.00336587	0.000305078	data	1
Role of type 2 innate lymphoid cells in airway allergic inflammation and tissue repair	0	0	0	1	0	0	0	6.75e-09	1.26e-09	2.93e-06	8.49e-09	data	1
Immune response_IL-3 signaling via ERK and PI3K	0	0	1	0	0	0	0	9.49e-09	1.35e-06	0.0198189	0.0112575	data	1
Development_c-Kit ligand signaling pathway during hemopoiesis	0	0	1	0	0	0	0	1.52e-08	1.4e-06	7.49e-05	0.00043363	data	1
Cell adhesion_Integrin inside-out signaling in T cells	0	0	0	1	0	0	0	3.06e-08	1.12e-05	0.0196941	2.03e-05	data	1
MAPK-independent proliferation of normal and asthmatic smooth muscle cells	0	0	0	0	0	1	0	3.83e-08	2.81e-08	0.000121987	0.000110698	data	1
Role of type 2 innate lymphoid cells in asthma	0	0	0	1	0	0	0	5.73e-08	1.09e-08	0.000133363	1.12e-07	data	1
Influence of smoking on activation of EGFR signaling in lung cancer cells	0	0	0	0	0	1	0	8.1e-08	5.13e-06	0.00812689	0.00184373	data	1
Main pathways of Schwann cells transformation in neurofibromatosis type 1	0	0	0	0	0	1	0	1.06e-07	2.9e-08	8.03e-07	0.000128049	data	1
Transcription_Androgen Receptor nuclear signaling	0	0	0	0	0	1	0	1.66e-07	1.84e-06	0.000123389	0.00232717	data	1
Transcription_Hypoxia- and receptor-mediated HIF-1 activation	0	0	0	0	0	1	0	1.66e-07	3.22e-07	0.00270212	NA	data	1
Neuroendocrine transdifferentiation in Prostate Cancer	0	0	0	0	1	0	0	3.26e-07	1.71e-05	0.00355876	0.0138289	data	1
Immune response_IL-7 signaling in B lymphocytes	0	0	0	1	0	0	0	3.88e-07	6.42e-07	6.71e-05	3.41e-05	data	1
Development_Ligand-independent activation of ESR1 and ESR2	0	0	0	0	0	1	0	5.46e-07	0.00181676	0.0282315	NA	data	1
Cell adhesion_PLAU signaling	0	0	0	0	0	1	0	6.33e-07	1.76e-08	0.00410438	NA	data	1
IL-6 signaling in Prostate Cancer	0	0	0	0	1	0	0	9.05e-07	1.28e-06	0.0010553	0.00644763	data	1
EGFR signaling in Prostate Cancer	0	0	0	0	0	1	0	1.05e-06	1.84e-06	0.00270212	0.00232717	data	1
EGFR signaling pathway in colorectal cancer	0	0	0	0	0	1	0	1.88e-06	7.12e-09	0.00116427	9.96e-06	data	1
IL-2 as a growth factor for T cells in multiple sclerosis	0	0	0	1	0	0	0	3.45e-06	6.17e-08	0.0292069	0.000381252	data	1
Signal transduction_PTEN pathway	0	0	0	0	0	1	0	6.02e-06	1.84e-06	0.0342809	0.0478072	data	1
Breast cancer (general schema)	0	0	0	0	0	1	0	7.82e-06	7.64e-12	1.19e-09	NA	data	1
Signal transduction_mTORC1 upstream signaling	0	0	0	0	0	1	0	1.01e-05	0.00288474	0.00177186	0.023008	data	1
Chemoresistance pathways mediated by constitutive activation of PI3K pathway and BCL-2 in small cell lung cancer	0	0	0	0	1	0	0	1.05e-05	9.27e-09	0.00147436	0.000219262	data	1
Immune response_Immunological synapse formation	0	1	0	0	0	0	0	1.26e-05	0.00126696	0.000574071	3.24e-05	data	1
Goblet cells in dry eye	0	0	0	0	0	1	0	1.35e-05	1.5e-05	0.0127072	9.51e-05	data	1
MAPK-mediated proliferation of normal and asthmatic smooth muscle cells	0	0	0	0	0	1	0	1.59e-05	3.16e-05	3.07e-05	0.00628812	data	1
Mitogenic action of ErbB2 in breast cancer	0	0	0	0	0	1	0	1.59e-05	3.16e-05	0.00922963	0.00628812	data	1
EGF- and HGF-dependent stimulation of metastasis in gastric cancer	0	0	0	0	0	1	0	1.95e-05	0.00052328	NA	NA	data	1
KLF6 and regulation of KLF6 alternative splicing in HCC	0	0	0	0	0	1	0	2.99e-05	1.68e-05	NA	3.25e-06	data	1
Stem cells_NOTCH1-induced self-renewal of glioblastoma stem cells	0	0	0	0	0	1	0	3.27e-05	0.00077277	0.0183447	0.0307266	data	1
Ligand-independent activation of Androgen receptor in Prostate Cancer	0	0	0	0	0	1	0	3.98e-05	1.57e-06	0.00274058	0.049549	data	1
Th2-cytokines induced expression of Mucin 5AC and maintenance of mucous cell phenotype in normal airway epithelium	0	0	0	1	0	0	0	4.3e-05	7.44e-06	0.000408739	0.000531311	data	1
Tissue Factor signaling in cancer via PAR1 and PAR2	0	0	0	0	0	1	0	6.5e-05	4.75e-06	0.000215254	9.07e-05	data	1
Development_Thromboxane A2 signaling pathway	0	0	0	0	0	1	0	8.16e-05	0.000124556	0.0487389	0.0163075	data	1
G-protein signaling_N-RAS regulation pathway	0	0	0	0	0	1	0	0.000135305	0.000575485	NA	NA	data	1
Non-genomic signaling of ESR2 (membrane) in lung cancer cells	0	0	0	0	0	1	0	0.000155635	0.000874402	0.00662045	0.00479033	data	1
Development_ERBB-family signaling	0	0	0	0	0	1	0	0.000605989	2.88e-05	0.00410438	0.000135008	data	1
Signal transduction_CXCR4 signaling via second messengers and JAK/STAT	0	0	0	1	0	0	0	0.00131249	0.000479162	0.0011568	0.000661475	data	1
Development_ERK5 in cell proliferation and neuronal survival	0	0	0	0	0	1	0	0.00135326	0.000737677	0.00640882	0.00442131	data	1
E-cadherin signaling and its regulation in gastric cancer	0	0	0	0	0	1	0	0.00137332	5.83e-05	NA	0.0217209	data	1
Stem cells_Dopamine-induced transactivation of EGFR in SVZ neural stem cells	0	0	0	0	0	1	0	0.00202403	6.17e-05	0.022805	0.00207256	data	1
Th2-cytokines-induced mucous metaplasia in asthma	0	0	0	1	0	0	0	0.00301342	0.000183604	0.0183447	0.00110817	data	1
Pancreatic cancer cell resistance to Tarceva (erlotinib)	0	0	0	0	0	1	0	0.00372901	0.000494662	NA	0.0455237	data	1
Signal transduction_mTORC2 upstream signaling	0	0	0	0	0	1	0	0.00389204	0.0355872	NA	NA	data	1
Translation_Non-genomic (rapid) action of Androgen Receptor	0	0	0	0	0	1	0	0.00503981	0.000388192	0.02549	NA	data	1
Role of alpha-6/beta-4 integrins in carcinoma progression	0	0	0	0	0	1	0	0.00688977	0.0205913	NA	NA	data	1
Development_EGFR signaling via small GTPases	0	0	0	0	0	1	0	0.0119389	0.000575485	NA	NA	data	1
Stem cells_EGF-induced proliferation of Type C cells in SVZ of adult brain	0	0	0	0	0	1	0	0.0119389	0.000575485	0.00724647	NA	data	1
Stem cells_Oligodendrocyte differentiation (general schema)	0	0	0	0	0	1	0	0.0251954	0.000105939	2.11e-05	NA	data	1
Development_EGFR signaling via PIP3	0	0	0	0	0	1	0	0.0290478	0.000737677	NA	NA	data	1
Transport_Macropinocytosis regulation by growth factors	0	0	0	0	0	1	0	NA	0.00158709	0.0495635	NA	data	1
Tumor infiltrating cells: selected markers and effector molecules	0	0	0	0	0	0	0	1.19e-96	9.11e-100	1.37e-58	3.02e-76	data	0
Antigen-presentation machinery in cancer	0	0	0	0	0	0	0	1.47e-76	7.11e-67	1.15e-50	2.37e-52	data	0
Natural killer cell-tumor cell interactions	0	0	0	0	0	0	0	1.81e-52	1.16e-50	2.04e-25	3.47e-42	data	0
Role of CD73 in tumor microenvironment	0	0	0	0	0	0	0	1.57e-48	5.18e-48	6.79e-29	3.61e-39	data	0
Renal tubulointerstitial injury in Lupus Nephritis	0	0	0	0	0	0	0	1.55e-44	1.33e-40	1.62e-26	1.75e-33	data	0
Glomerular injury in Lupus Nephritis	0	0	0	0	0	0	0	5.46e-43	2.5e-31	2.18e-20	1.18e-28	data	0
Aberrant production of IL-2 and IL-17 in SLE T cells	0	0	0	0	0	0	0	2.4e-42	1.24e-18	3.5e-08	1.08e-09	data	0
Vascular endothelial cell damage in SLE	0	0	0	0	0	0	0	7.07e-41	2.8e-40	1.39e-19	1.78e-26	data	0
Macrophage and dendritic cell phenotype shift in cancer	0	0	0	0	0	0	0	5.84e-40	1.62e-45	1.47e-27	1.63e-28	data	0
SLE genetic marker-specific pathways in T cells	0	0	0	0	0	0	0	1.3e-39	1.62e-24	4.8e-16	3.41e-22	data	0
Chemokines in inflammation in adipose tissue and liver in obesity, type 2 diabetes and metabolic syndrome X	0	0	0	0	0	0	0	6.18e-39	2.17e-32	7.91e-24	5.6e-26	data	0
Rheumatoid arthritis (general schema)	0	0	0	0	0	0	0	9.2e-36	1.58e-39	2.72e-35	1.28e-42	data	0
Role of IL-23/ T17 pathogenic axis in psoriasis	0	0	0	0	0	0	0	5.91e-35	2.45e-33	3.73e-18	7.49e-23	data	0
Th1 cells in dry eye	0	0	0	0	0	0	0	2.02e-34	1.08e-26	1.17e-24	2.62e-26	data	0
SLE genetic marker-specific pathways in antigen-presenting cells (APC)	0	0	0	0	0	0	0	5.01e-33	5.88e-25	1.21e-16	6.99e-25	data	0
Role of CD8+ Tc1 cells in COPD	0	0	0	0	0	0	0	5.87e-33	4.94e-27	5.18e-21	1.24e-25	data	0
Immune response_Naive CD4+ T cell differentiation	0	0	0	0	0	0	0	1.16e-31	6.6e-29	4.93e-26	6.52e-30	data	0
Oxidative stress_ROS-induced cellular signaling	0	0	0	0	0	0	0	1.25e-31	9.6e-26	5.36e-11	7.12e-13	data	0
Maturation and migration of dendritic cells in skin sensitization	0	0	0	0	0	0	0	1.43e-31	8.57e-23	1.47e-23	2.26e-28	data	0
Immune response_Th1 and Th2 cell differentiation	0	0	0	0	0	0	0	1.57e-30	2.52e-23	1.36e-19	5e-19	data	0
Immune response_Differentiation and clonal expansion of CD8+ T cells	0	0	0	0	0	0	0	1.72e-29	4.93e-27	1.27e-14	2.02e-27	data	0
Macrophage-induced immunosuppression in the tumor microenvironment	0	0	0	0	0	0	0	2.42e-29	5.76e-29	6.87e-15	2.89e-18	data	0
Immune response_Role of PKR in stress-induced antiviral cell response	0	0	0	0	0	0	0	5.16e-29	4.59e-20	3.44e-15	2.06e-19	data	0
Immune response_Th17, Th22 and Th9 cell differentiation	0	0	0	0	0	0	0	8.47e-28	6.91e-24	2.2e-21	4.92e-24	data	0
Immune response_HSP60 and HSP70/ TLR signaling pathway	0	0	0	0	0	0	0	1.51e-27	3.62e-26	5.74e-17	4.99e-20	data	0
Immune response_Role of HMGB1 in dendritic cell maturation and migration	0	0	0	0	0	0	0	3.26e-27	2.86e-25	4.46e-21	2.05e-30	data	0
Immune response_IL-10 signaling pathway	0	0	0	0	0	0	0	5.37e-27	6.41e-28	1.67e-17	4.17e-21	data	0
PDE4 regulation of cyto/chemokine expression in inflammatory skin diseases	0	0	0	0	0	0	0	1.58e-26	1.07e-16	3.5e-11	7.24e-24	data	0
Release of pro-inflammatory factors and proteases by alveolar macrophages in asthma	0	0	0	0	0	0	0	1.62e-26	1.4e-28	4.85e-17	1.24e-25	data	0
Th17 cytokines in COPD	0	0	0	0	0	0	0	2.18e-26	1.61e-27	4.34e-21	6.99e-27	data	0
Memory CD8+ T cells in allergic contact dermatitis	0	0	0	0	0	0	0	1.33e-25	1.1e-29	2.3e-14	1.06e-23	data	0
Dual function of Treg cells in cancer development	0	0	0	0	0	0	0	1.58e-25	1.7e-24	2.31e-20	6.28e-22	data	0
Inflammatory response in dry eye	0	0	0	0	0	0	0	2.32e-25	3.2e-23	4.47e-23	2.59e-27	data	0
TNF-alpha-induced inflammatory signaling in normal and asthmatic airway epithelium	0	0	0	0	0	0	0	3.66e-25	1.71e-21	1.65e-17	9.83e-23	data	0
Immune response_T cell co-signaling receptors, schema	0	0	0	0	0	0	0	1.85e-24	8e-30	2.26e-12	2.99e-12	data	0
NK cells in allergic contact dermatitis	0	0	0	0	0	0	0	2.46e-24	1.44e-25	9.58e-15	9.14e-28	data	0
Immune response_IL-4-responsive genes in type 2 immunity	0	0	0	0	0	0	0	2.63e-24	2.28e-36	6.35e-15	3.19e-22	data	0
Autoimmune response in Sjogren's syndrome	0	0	0	0	0	0	0	3.69e-24	4.03e-25	1.77e-16	1.8e-26	data	0
Immune response_IL-18 signaling	0	0	0	0	0	0	0	3.84e-24	1.67e-21	4.03e-11	8e-16	data	0
IFN-gamma and Th2 cytokines-induced inflammatory signaling in normal and asthmatic airway epithelium	0	0	0	0	0	0	0	4.46e-24	2.52e-23	3.2e-18	4.24e-22	data	0
Immunological synapse between dendritic and CD8+ T cells in allergic contact dermatitis	0	0	0	0	0	0	0	5.89e-24	2.26e-25	2.53e-10	3.61e-15	data	0
Immune response_T cell subsets: secreted signals	0	0	0	0	0	0	0	6.05e-24	2.79e-20	1.36e-13	7.24e-21	data	0
Immune response_Induction of the antigen presentation machinery by IFN-gamma	0	0	0	0	0	0	0	6.37e-24	7.32e-12	1.08e-10	1.58e-17	data	0
Immune response_IFN-alpha/beta signaling via JAK/STAT	0	0	0	0	0	0	0	8.15e-24	5.14e-19	6.74e-13	2.02e-23	data	0
Apoptosis in conjunctival epithelial cells in dry eye	0	0	0	0	0	0	0	9.96e-24	3.4e-20	9.15e-16	8.6e-24	data	0
Signal transduction_Angiotensin II/AGTR1 signaling via Notch, Beta-catenin and NF-kB pathways	0	0	0	0	0	0	0	1.04e-23	2.09e-13	1.93e-06	6.36e-11	data	0
Immune response_Role of DPP4 (CD26) in immune regulation	0	0	0	0	0	0	0	1.13e-23	7.2e-19	1.73e-17	3.35e-20	data	0
Putative role of Tregs in COPD	0	0	0	0	0	0	0	1.32e-23	4.51e-17	1.17e-14	2.25e-11	data	0
Inhibition of apoptosis in multiple myeloma	0	0	0	0	0	0	0	3.69e-23	1.61e-27	8.54e-17	1.32e-18	data	0
Cooperative action of IFN-gamma and TNF-alpha on astrocytes in multiple sclerosis	0	0	0	0	0	0	0	4.27e-23	2.71e-18	3.16e-12	7.87e-21	data	0
Proinflammatory cytokine release from eosinophils in asthma	0	0	0	0	0	0	0	1.01e-22	9.58e-21	1.8e-17	1.22e-17	data	0
NF-kB-, AP-1- and MAPKs-mediated proinflammatory cytokine production by eosinophils in asthma	0	0	0	0	0	0	0	1.2e-22	1.78e-20	7.88e-15	7.31e-17	data	0
TNF-alpha and IL-1 beta-mediated regulation of contraction and secretion of inflammatory factors in normal and asthmatic airway smooth muscle	0	0	0	0	0	0	0	2.51e-22	1.06e-17	4.55e-09	4.2e-12	data	0
Immune response_Histamine H1 receptor signaling in immune response	0	0	0	0	0	0	0	2.53e-22	1.56e-16	4.46e-06	8.59e-09	data	0
Immune response_OX40L/ OX40 signaling pathway	0	0	0	0	0	0	0	2.64e-22	9.16e-21	2.55e-10	8.18e-20	data	0
The role of KEAP1/NRF2 pathway in skin sensitization	0	0	0	0	0	0	0	2.68e-22	3.9e-09	9.67e-13	5.56e-11	data	0
Th2 cytokine- and TNF-alpha-induced inflammatory response in asthmatic airway fibroblasts	0	0	0	0	0	0	0	3.66e-22	1.13e-21	1.88e-14	6.78e-19	data	0
Immune escape mechanisms in Prostate Cancer	0	0	0	0	0	0	0	5.66e-22	6.47e-17	1.36e-13	2.53e-17	data	0
IL-17-induced mucin expression in CF airways	0	0	0	0	0	0	0	6.26e-22	2.42e-17	1.57e-11	1.49e-18	data	0
Schema: General stress in dry eye	0	0	0	0	0	0	0	8.82e-22	3.69e-20	3.99e-23	1.3e-30	data	0
IL-1 signaling in melanoma	0	0	0	0	0	0	0	1.07e-21	6.36e-21	1.03e-12	4.37e-17	data	0
Release of pro-inflammatory mediators and elastolytic enzymes by alveolar macrophages in COPD	0	0	0	0	0	0	0	1.58e-21	3.45e-25	5.98e-14	2.67e-16	data	0
Immune response_IL-17 signaling pathways	0	0	0	0	0	0	0	1.63e-21	1.62e-22	3.86e-07	2.7e-16	data	0
Regulation of mast cell survival in asthma	0	0	0	0	0	0	0	5.18e-21	7.2e-19	8.58e-13	3.19e-12	data	0
Interleukins-induced inflammatory signaling in normal and asthmatic airway epithelium	0	0	0	0	0	0	0	1.02e-20	2.26e-25	9.67e-13	3.12e-23	data	0
Chemokines in dry eye	0	0	0	0	0	0	0	1.06e-20	3.69e-19	8.01e-12	1.85e-20	data	0
Interleukins-induced inflammatory response in asthmatic airway fibroblasts	0	0	0	0	0	0	0	1.16e-20	3.2e-23	8.22e-11	6.78e-19	data	0
MMP-9 in dry eye	0	0	0	0	0	0	0	1.71e-20	9.01e-16	2.52e-10	1.68e-13	data	0
Differentiation of Th2 cells in asthma	0	0	0	0	0	0	0	1.79e-20	3.29e-17	3.32e-13	4.28e-15	data	0
Apoptosis and survival_Anti-apoptotic TNFs/NF-kB/Bcl-2 pathway	0	0	0	0	0	0	0	2.46e-20	6.36e-21	1.36e-11	5.41e-20	data	0
Apoptosis and survival_Role of PKR in stress-induced apoptosis	0	0	0	0	0	0	0	3.65e-20	7.32e-12	8.34e-09	5.9e-15	data	0
Apoptotic pathways and resistance to apoptosis in lung cancer cells	0	0	0	0	0	0	0	3.65e-20	8.28e-16	4.95e-16	3.73e-08	data	0
Generation of cytotoxic CD8+ T cells in COPD	0	0	0	0	0	0	0	3.79e-20	2.79e-20	2.05e-08	7.24e-21	data	0
Regulation of proinflammatory cytokine production by Th2 cells in asthma	0	0	0	0	0	0	0	6.12e-20	1.78e-20	1.68e-12	3.13e-21	data	0
Immune response_MIF-mediated glucocorticoid regulation	0	0	0	0	0	0	0	7.52e-20	4.91e-15	1.75e-11	1.07e-14	data	0
Role of TLR signaling in skin sensitization	0	0	0	0	0	0	0	1.47e-19	2.18e-16	2.7e-12	2.74e-15	data	0
Role of microRNAs in cell migration, survival and angiogenesis in colorectal cancer	0	0	0	0	0	0	0	1.55e-19	6.99e-11	5.22e-21	0.00082229	data	0
Immune response_IL-16 signaling pathway	0	0	0	0	0	0	0	1.55e-19	2.7e-16	1.51e-08	2.02e-13	data	0
CD8+ Tc1 cells in allergic contact dermatitis	0	0	0	0	0	0	0	1.83e-19	7.3e-18	3.72e-16	2.04e-20	data	0
Role of fibroblasts and keratinocytes in the elicitation phase of allergic contact dermatitis	0	0	0	0	0	0	0	1.83e-19	1.66e-19	3.72e-16	2.04e-20	data	0
Langerhans cell migration to lymph nodes in allergic contact dermatitis	0	0	0	0	0	0	0	3.23e-19	3.4e-20	1.25e-08	1.77e-20	data	0
Immune response_IFN-alpha/beta signaling via MAPKs	0	0	0	0	0	0	0	3.36e-19	1.21e-08	4.51e-07	2.69e-06	data	0
Apo-2L(TNFSF10)-induced apoptosis in melanoma	0	0	0	0	0	0	0	3.41e-19	4.7e-16	4.69e-08	4.28e-15	data	0
Mast cell migration in asthma	0	0	0	0	0	0	0	4.16e-19	4.84e-25	1.96e-14	2.13e-20	data	0
Immune response_IL-1 signaling pathway	0	0	0	0	0	0	0	4.32e-19	8.9e-28	4.05e-13	5.42e-19	data	0
PDE4 regulation of cyto/chemokine expression in arthritis	0	0	0	0	0	0	0	4.67e-19	5.16e-17	2.43e-10	9.87e-20	data	0
Signal transduction_Soluble CXCL16 signaling	0	0	0	0	0	0	0	4.67e-19	6.79e-11	1.98e-08	1.44e-08	data	0
Immune response_HMGB1/RAGE signaling pathway	0	0	0	0	0	0	0	5.61e-19	5.63e-18	1.08e-10	1.58e-12	data	0
Differences between Langerhans cells and dermal dendritic cells in allergic contact dermatitis	0	0	0	0	0	0	0	8.57e-19	2.46e-17	2.83e-13	1.85e-20	data	0
Role of cell adhesion in vaso-occlusion in Sickle cell disease	0	0	0	0	0	0	0	1.19e-18	4.22e-26	2.43e-08	1.73e-15	data	0
microRNA in Prostate Cancer	0	0	0	0	0	0	0	2.02e-18	8.51e-06	4.45e-09	0.000747372	data	0
Th1 and Th17 cells in an autoimmune mechanism of emphysema formation in smokers	0	0	0	0	0	0	0	2.83e-18	1.1e-16	2.31e-15	9.68e-15	data	0
Immune response_IL-23 signaling pathway	0	0	0	0	0	0	0	3.15e-18	9.97e-13	2.12e-09	3.57e-11	data	0
Apoptosis in lacrimal gland cells in dry eye	0	0	0	0	0	0	0	3.15e-18	1.42e-16	2.65e-08	6.88e-22	data	0
Role of Bregs in attenuation of T and NK cells mediated anti-tumor immune responses	0	0	0	0	0	0	0	4.15e-18	8.57e-23	2.95e-19	8.46e-22	data	0
Role of IL-17-producing T cells in allergic contact dermatitis	0	0	0	0	0	0	0	4.57e-18	4.91e-15	6.87e-13	7.14e-22	data	0
Signal transduction_Angiotensin II/ AGTR1 signaling via JAK/STAT	0	0	0	0	0	0	0	5.93e-18	4.85e-09	1.52e-15	5.94e-08	data	0
Eosinophil-derived cytokines in airway remodeling in asthma	0	0	0	0	0	0	0	5.98e-18	1.99e-17	1.87e-12	1.78e-12	data	0
Apoptosis and survival_Apoptotic TNF-family pathways	0	0	0	0	0	0	0	9.51e-18	1.33e-19	7.08e-14	1.42e-10	data	0
Cigarette smoke-mediated attenuation of antibacterial and antivirus immune response	0	0	0	0	0	0	0	9.52e-18	1.7e-13	1.27e-13	1.39e-17	data	0
Apoptosis and survival_APRIL and BAFF signaling	0	0	0	0	0	0	0	1.44e-17	8.47e-16	2.7e-05	5.87e-15	data	0
Survival pathways in Prostate Cancer	0	0	0	0	0	0	0	1.47e-17	1.55e-13	2.71e-13	1.77e-06	data	0
Immune response_Lectin induced complement pathway	0	0	0	0	0	0	0	1.47e-17	1.55e-13	8.95e-06	1.91e-07	data	0
Suppression of p53 signaling in multiple myeloma	0	0	0	0	0	0	0	1.47e-17	1.34e-11	2.71e-13	1.59e-09	data	0
Immune response_IL-33 signaling pathway	0	0	0	0	0	0	0	1.48e-17	1.66e-16	1.49e-06	5.37e-13	data	0
Immune response_IL-11 signaling pathway via MEK/ERK and PI3K/AKT cascades	0	0	0	0	0	0	0	1.97e-17	2.96e-15	1.08e-09	8.14e-11	data	0
Immune response_HMGB1/TLR signaling pathway	0	0	0	0	0	0	0	2.03e-17	1.03e-15	1.67e-09	4.26e-17	data	0
Immune response_IL-6-induced acute-phase response in hepatocytes	0	0	0	0	0	0	0	2.03e-17	2.65e-18	1.86e-08	6.36e-08	data	0
Immune response_IL-27 signaling pathway	0	0	0	0	0	0	0	2.04e-17	9.8e-12	7.18e-10	2.57e-11	data	0
T cell apoptosis in dry eye	0	0	0	0	0	0	0	2.04e-17	2.7e-19	3.64e-11	1.72e-19	data	0
Influence of multiple myeloma cells on bone marrow stromal cells	0	0	0	0	0	0	0	2.6e-17	2.47e-21	1.79e-12	1.72e-13	data	0
The innate immune response to contact allergens	0	0	0	0	0	0	0	2.6e-17	2.25e-18	2.04e-16	6.45e-15	data	0
Role of IFN-beta in the improvement of blood-brain barrier integrity in multiple sclerosis	0	0	0	0	0	0	0	2.79e-17	2.25e-14	6.56e-13	1.27e-16	data	0
Neutrophil resistance to apoptosis in COPD and proresolving impact of lipid mediators	0	0	0	0	0	0	0	4.85e-17	4.28e-13	1.31e-10	1.77e-08	data	0
Immune response_TLR2 and TLR4 signaling pathways	0	0	0	0	0	0	0	5.64e-17	1.07e-16	2.63e-06	1.31e-10	data	0
Role of IFN-beta in inhibition of Th1 cell differentiation in multiple sclerosis	0	0	0	0	0	0	0	6.84e-17	4.98e-14	1.86e-13	1.12e-14	data	0
Role of keratinocytes and Langerhans cells in skin sensitization	0	0	0	0	0	0	0	7.87e-17	1.54e-18	7.21e-11	4.6e-14	data	0
Immune response_Innate immune response to RNA viral infection	0	0	0	0	0	0	0	9.05e-17	3.48e-09	7.52e-05	1.08e-06	data	0
Immune response_IFN-alpha/beta signaling via PI3K and NF-kB pathways	0	0	0	0	0	0	0	9.32e-17	6.83e-10	8.28e-06	2.14e-09	data	0
Activation of TNF-alpha-dependent pro-tumoral effect in colorectal cancer	0	0	0	0	0	0	0	1.05e-16	8.55e-13	1.98e-08	9.2e-11	data	0
Neutrophil-derived granule proteins and cytokines in asthma	0	0	0	0	0	0	0	1.05e-16	3.71e-18	2.1e-12	6.34e-12	data	0
Immune response_Inhibitory PD-1 signaling in T cells	0	0	0	0	0	0	0	1.05e-16	8.98e-15	1e-12	3.48e-09	data	0
B cells in Sjogren's syndrome	0	0	0	0	0	0	0	1.17e-16	4.38e-20	3.37e-10	9.83e-23	data	0
TNF-alpha, IL-1 beta induce dyslipidemia and inflammation in obesity and type 2 diabetes in adipocytes	0	0	0	0	0	0	0	1.62e-16	1.33e-12	1.62e-10	1.42e-10	data	0
Production and activation of TGF-beta in airway smooth muscle cells	0	0	0	0	0	0	0	1.71e-16	2.02e-17	5.62e-12	4.72e-08	data	0
TGF-beta signaling via kinase cascades in breast cancer	0	0	0	0	0	0	0	1.76e-16	4.79e-22	5.84e-10	1.14e-08	data	0
Immune response_TLR5, TLR7, TLR8 and TLR9 signaling pathways	0	0	0	0	0	0	0	1.76e-16	1.73e-15	5.84e-10	5.37e-13	data	0
Aminoglycoside- and cisplatin-induced hair cell death	0	0	0	0	0	0	0	2.19e-16	7.9e-14	1.28e-10	1.29e-11	data	0
Role of IL-6 in obesity and type 2 diabetes in adipocytes	0	0	0	0	0	0	0	2.28e-16	3.66e-10	4.21e-07	3.54e-05	data	0
Resistance of melanoma cells to Apo-2L(TNFSF10)-induced apoptosis	0	0	0	0	0	0	0	2.64e-16	5.06e-17	3.16e-12	7.98e-10	data	0
Immune response_TSLP signalling	0	0	0	0	0	0	0	2.64e-16	2.35e-11	5.62e-08	5.87e-15	data	0
Basophil migration in asthma	0	0	0	0	0	0	0	3.56e-16	1.99e-24	1.51e-08	3.73e-17	data	0
Immune response_Histamine signaling in dendritic cells	0	0	0	0	0	0	0	3.83e-16	1.78e-10	4.45e-09	8.04e-13	data	0
Immune response_TREM1 signaling pathway	0	0	0	0	0	0	0	5.39e-16	1.79e-10	2.31e-06	1.59e-10	data	0
Role of stellate cells in progression of pancreatic cancer	0	0	0	0	0	0	0	5.39e-16	5.4e-17	8.35e-09	1.75e-09	data	0
Th2 cytokine- and TNF-alpha-induced profibrotic response in asthmatic airway fibroblasts/ myofibroblasts	0	0	0	0	0	0	0	7.1e-16	3.52e-17	7.3e-12	2.96e-08	data	0
Immune response_Lysophosphatidic acid signaling via NF-kB	0	0	0	0	0	0	0	7.1e-16	5.04e-14	3.51e-07	7.03e-14	data	0
Immune response_IL-12 signaling pathway	0	0	0	0	0	0	0	7.34e-16	4.61e-12	3.37e-05	1.19e-06	data	0
Immune response_C3a signaling	0	0	0	0	0	0	0	7.34e-16	4.78e-13	1.63e-09	7.66e-16	data	0
CD8 alpha/alpha Treg cells in dry eye	0	0	0	0	0	0	0	7.84e-16	1.42e-17	7.18e-10	1.72e-19	data	0
Pro-tumoral TNF-alpha signaling in melanoma	0	0	0	0	0	0	0	1.22e-15	7.64e-12	9.06e-07	1.01e-10	data	0
Signal transduction_CXCR4 signaling via MAPKs cascades	0	0	0	0	0	0	0	1.29e-15	4.39e-10	0.000421318	3.1e-06	data	0
Immune response_Classical complement pathway	0	0	0	0	0	0	0	1.29e-15	8.44e-13	6.44e-08	3.6e-07	data	0
Effect of H. pylori infection on apoptosis in gastric epithelial cells	0	0	0	0	0	0	0	1.29e-15	3.04e-09	6.44e-08	3.48e-09	data	0
Role of Apo-2L(TNFSF10) in Prostate Cancer cell apoptosis	0	0	0	0	0	0	0	1.41e-15	2.93e-15	9.58e-15	4.65e-07	data	0
Impaired macrophage phagocytic function in asthma	0	0	0	0	0	0	0	2.05e-15	1.07e-12	2.11e-05	1.31e-05	data	0
Eosinophil granule protein release in asthma	0	0	0	0	0	0	0	2.31e-15	1.64e-14	8.48e-08	3.86e-10	data	0
Putative pathways of activation of classical complement system in major depressive disorder	0	0	0	0	0	0	0	2.45e-15	3.48e-09	9.13e-06	4.07e-09	data	0
Glucocorticoid- and LABA-mediated inhibition of pro-inflammatory signaling in airway fibroblasts/myofibroblasts	0	0	0	0	0	0	0	2.45e-15	2.88e-15	2.63e-11	8.35e-12	data	0
Eosinophil adhesion and transendothelial migration in asthma	0	0	0	0	0	0	0	3.18e-15	6.26e-18	6.49e-08	6.8e-07	data	0
Myeloid-derived suppressor cells and M2 macrophages in cancer	0	0	0	0	0	0	0	4.3e-15	5.93e-17	4.55e-10	3.84e-11	data	0
Signal transduction_NF-kB activation pathways	0	0	0	0	0	0	0	4.69e-15	2.54e-15	3.63e-08	2.69e-15	data	0
Immune response_IL-12-induced IFN-gamma production	0	0	0	0	0	0	0	7.29e-15	3.31e-08	1.61e-06	7.91e-07	data	0
Cigarette smoke-induced inflammatory signaling in airway epithelial cells	0	0	0	0	0	0	0	7.29e-15	2.49e-13	1.84e-07	1.52e-11	data	0
Role of IL-8 in melanoma	0	0	0	0	0	0	0	7.29e-15	2.65e-18	1.86e-08	7.37e-13	data	0
Immune response_T cell subsets: cell surface markers	0	0	0	0	0	0	0	8.37e-15	4.83e-15	6.56e-13	2.22e-10	data	0
Immune response_MIF in innate immunity response	0	0	0	0	0	0	0	8.99e-15	1.93e-15	5.1e-06	4.04e-12	data	0
GLP-1 in beta cell apoptosis in type 2 diabetes	0	0	0	0	0	0	0	9.36e-15	4.1e-11	1.17e-07	9.14e-10	data	0
Immune response_Alternative complement pathway	0	0	0	0	0	0	0	1.47e-14	6.29e-07	9.89e-10	0.000945524	data	0
IL-6 signaling in colorectal cancer	0	0	0	0	0	0	0	1.56e-14	5.26e-13	2.14e-10	5.22e-14	data	0
Development_PEDF signaling	0	0	0	0	0	0	0	1.7e-14	6.79e-11	7.14e-06	2.26e-14	data	0
Immune response_Bacterial infections in normal airways	0	0	0	0	0	0	0	1.7e-14	8.5e-14	1.56e-07	3.96e-13	data	0
Glucocorticoids-mediated inhibition of pro-constrictory and pro-inflammatory signaling in airway smooth muscle cells	0	0	0	0	0	0	0	1.7e-14	8.5e-14	2.3e-09	3.96e-13	data	0
Immune response_MIF-induced cell adhesion, migration and angiogenesis	0	0	0	0	0	0	0	1.7e-14	8.55e-13	7.14e-06	1.44e-08	data	0
Immune response_PGE2 signaling in immune response	0	0	0	0	0	0	0	1.83e-14	6.28e-10	1.75e-05	4.99e-09	data	0
Immune response_IL-15 signaling	0	0	0	0	0	0	0	2.01e-14	1.73e-15	4.44e-05	9.4e-07	data	0
Activation of osteoclast differentiation in bone lesions formation in multiple myeloma	0	0	0	0	0	0	0	2.18e-14	8.57e-12	0.0025405	7.93e-07	data	0
Stem cells_Inflammatory response in ischemia-reperfusion injury during myocardial infarction	0	0	0	0	0	0	0	2.19e-14	3.68e-18	2.77e-15	3.39e-17	data	0
Development_VEGF signaling via VEGFR2 - generic cascades	0	0	0	0	0	0	0	2.43e-14	5.1e-10	0.000388273	0.00657849	data	0
Immune response_C5a signaling	0	0	0	0	0	0	0	3.03e-14	1.11e-10	5.06e-05	1.46e-05	data	0
Nociception_Expression and role of Nociceptin in immune system	0	0	0	0	0	0	0	3.4e-14	1.25e-10	7.62e-11	5.09e-10	data	0
Apoptosis and survival_Lymphotoxin-beta receptor signaling	0	0	0	0	0	0	0	3.5e-14	6.49e-16	1.52e-07	4.37e-17	data	0
HSP60 in Sjogren's syndrome	0	0	0	0	0	0	0	3.99e-14	3.75e-13	6.35e-12	3.19e-12	data	0
IL-6 signaling in multiple myeloma	0	0	0	0	0	0	0	5.31e-14	1.78e-10	2.7e-07	1.72e-05	data	0
NF-kB pathway in multiple myeloma	0	0	0	0	0	0	0	5.59e-14	7.21e-15	8.22e-11	7.04e-16	data	0
NALP3 inflammasome activation in age-related macular degeneration (AMD)	0	0	0	0	0	0	0	5.59e-14	1.14e-13	1.07e-09	9.95e-12	data	0
IL-17 and IL-17F-induced inflammatory signaling in normal and asthmatic airway epithelium	0	0	0	0	0	0	0	5.67e-14	6.41e-14	8.52e-08	4.07e-09	data	0
Canonical Leptin pathways in breast cancer	0	0	0	0	0	0	0	6.17e-14	1.61e-09	6.55e-07	9.65e-08	data	0
Role of Tissue factor-induced Thrombin signaling in cancerogenesis	0	0	0	0	0	0	0	6.33e-14	7.2e-09	0.00726483	0.0128017	data	0
Signal transduction_Leptin signaling via JAK/STAT and MAPK cascade	0	0	0	0	0	0	0	6.51e-14	2.35e-11	4.95e-07	1.15e-08	data	0
Immune response_HMGB1 release from the cell	0	0	0	0	0	0	0	6.51e-14	8.76e-07	3.88e-06	1.15e-08	data	0
Apoptosis and survival_TNFR1 signaling pathway	0	0	0	0	0	0	0	6.65e-14	1.91e-09	2.43e-08	3.41e-05	data	0
Noise-induced hair cell death and spiral ganglion neuron degeneration	0	0	0	0	0	0	0	6.96e-14	5.12e-11	2.64e-06	2.18e-08	data	0
Resolution of inflammation in healing myocardial infarction	0	0	0	0	0	0	0	7.11e-14	1.32e-12	3.12e-06	2.3e-08	data	0
T cell generation in COPD	0	0	0	0	0	0	0	7.11e-14	5.85e-14	7.21e-11	4.6e-14	data	0
A proinflammatory phenotype of senescent alveolar epithelial cells in COPD	0	0	0	0	0	0	0	7.11e-14	3.98e-10	0.000245491	1.1e-09	data	0
Immune response_IL-5 signaling via JAK/STAT	0	0	0	0	0	0	0	7.22e-14	4.69e-13	3.32e-11	6.54e-10	data	0
Role of fibroblasts in the sensitization phase of allergic contact dermatitis	0	0	0	0	0	0	0	7.46e-14	1.19e-12	1.89e-10	2.09e-13	data	0
Effect of H. pylori infection on inflammation in gastric epithelial cells	0	0	0	0	0	0	0	8.83e-14	5.44e-12	7.49e-05	2.22e-09	data	0
Leptin signaling in colorectal cancer	0	0	0	0	0	0	0	1.23e-13	3.07e-09	3.39e-08	4.61e-08	data	0
IL-1 beta- and Endothelin-1-induced fibroblast/ myofibroblast migration and extracellular matrix production in asthmatic airways	0	0	0	0	0	0	0	1.27e-13	2.74e-14	6.73e-07	2.07e-06	data	0
CD8+ T reg cells in dry eye	0	0	0	0	0	0	0	1.39e-13	1.7e-13	5.31e-15	1.39e-11	data	0
Regulation of microRNAs in colorectal cancer	0	0	0	0	0	0	0	1.41e-13	0.000422152	3.14e-12	0.0102608	data	0
Regulation of VEGF expression in lung cancer	0	0	0	0	0	0	0	1.55e-13	8.28e-16	2.91e-06	2.38e-05	data	0
Resistance of pancreatic cancer cells to death receptor signaling	0	0	0	0	0	0	0	2e-13	2.08e-14	2.9e-11	3.51e-07	data	0
Endothelin-1- and TNF-alpha-induced inflammatory response in asthmatic airway fibroblasts	0	0	0	0	0	0	0	2.18e-13	3.64e-17	1.97e-08	7.85e-16	data	0
Signal transduction_Angiotensin II/ AGTR1 signaling via RhoA and JNK	0	0	0	0	0	0	0	2.28e-13	1.63e-08	0.000815718	NA	data	0
Attenuation of IFN type I signaling in melanoma cells	0	0	0	0	0	0	0	2.35e-13	7.25e-11	2.72e-08	5.22e-14	data	0
Role of alveolar cell senescence in COPD	0	0	0	0	0	0	0	2.35e-13	6.57e-09	0.0127072	9.51e-05	data	0
Immune response_CCL2 signaling	0	0	0	0	0	0	0	2.59e-13	9.36e-11	5.83e-07	4.67e-08	data	0
Role of GITR in skin sensitization	0	0	0	0	0	0	0	3.15e-13	4.46e-14	2.89e-07	1.79e-14	data	0
T regulatory cells in asthma	0	0	0	0	0	0	0	3.21e-13	2.32e-14	2.59e-13	4.78e-10	data	0
Development_GM-CSF signaling	0	0	0	0	0	0	0	3.3e-13	8.44e-10	0.00461187	1.84e-08	data	0
Angiogenesis in HCC	0	0	0	0	0	0	0	3.3e-13	8.07e-18	0.000256416	1.77e-06	data	0
TGF-beta signaling via microRNA in breast cancer	0	0	0	0	0	0	0	3.3e-13	2.3e-07	2.06e-07	0.000105184	data	0
Oxidative stress in adipocyte dysfunction in type 2 diabetes and metabolic syndrome X	0	0	0	0	0	0	0	3.48e-13	1.37e-10	2.65e-05	1.8e-05	data	0
Signal transduction_Angiotensin II/ AGTR1 signaling via TGF-beta 1 and SMADs	0	0	0	0	0	0	0	4.48e-13	2.63e-06	1.72e-08	0.0359401	data	0
Inhibition of apoptosis in gastric cancer	0	0	0	0	0	0	0	4.48e-13	1.34e-10	1.72e-08	3.2e-06	data	0
Apoptosis and survival_Anti-apoptotic TNFs/NF-kB/IAP pathway	0	0	0	0	0	0	0	4.78e-13	4.76e-13	2.52e-10	7.93e-07	data	0
Pro-oncogenic action of Estradiol/ Estrogen receptors in ovarian cancer	0	0	0	0	0	0	0	4.97e-13	4.28e-13	6.32e-05	1.62e-07	data	0
Development_MicroRNA-dependent regulation of EMT	0	0	0	0	0	0	0	6.33e-13	NA	NA	0.00518249	data	0
Stem cells_TNF-alpha, IL-1 alpha and WNT5A-dependent regulation of osteogenesis and adipogenesis in mesenchymal stem cells	0	0	0	0	0	0	0	6.94e-13	2.07e-10	2.73e-05	0.000449697	data	0
Th9 cells in asthma	0	0	0	0	0	0	0	6.94e-13	2.62e-13	0.000725603	1.88e-13	data	0
Multiple sclerosis (general schema)	0	0	0	0	0	0	0	7.09e-13	9.46e-12	1.08e-13	9.75e-14	data	0
Role of IL-2 in the enhancement of NK cell cytotoxicity in multiple sclerosis	0	0	0	0	0	0	0	7.11e-13	5.97e-14	2.31e-05	1.97e-15	data	0
Autocrine production of eosinophil pro-survival cytokines in asthma	0	0	0	0	0	0	0	7.11e-13	1.42e-16	2.78e-06	7.21e-10	data	0
Complement pathway disruption in thrombotic microangiopathy	0	0	0	0	0	0	0	8.78e-13	1.76e-08	3.16e-12	1.47e-07	data	0
Role of Th17 cells in asthma	0	0	0	0	0	0	0	1.13e-12	3.48e-09	9.5e-07	1.98e-10	data	0
Stimulation of TGF-beta signaling in lung cancer	0	0	0	0	0	0	0	1.19e-12	4.61e-12	1.17e-07	4.52e-12	data	0
Eosinophil survival in asthma	0	0	0	0	0	0	0	1.25e-12	3.43e-18	1.42e-10	5.84e-13	data	0
Tumor metabolic pathways promoting development of Treg cells	0	0	0	0	0	0	0	1.42e-12	5.64e-16	1.71e-12	2.12e-17	data	0
Immune response_Antiviral actions of Interferons	0	0	0	0	0	0	0	1.52e-12	6.28e-05	2.91e-06	3.1e-06	data	0
Immune response_Regulation of T cell function by CTLA-4	0	0	0	0	0	0	0	1.67e-12	3.31e-08	1.25e-05	7.91e-05	data	0
Immune response_IL-4-induced regulators of cell growth, survival, differentiation and metabolism	0	0	0	0	0	0	0	1.87e-12	3.25e-17	2.61e-09	2.85e-07	data	0
Immune response_Oncostatin M signaling via JAK-Stat	0	0	0	0	0	0	0	2.07e-12	1.03e-07	6.27e-08	2.32e-06	data	0
Role of TNF-alpha, IL-1beta and IL-6 in development of obesity and type 2 diabetes in liver	0	0	0	0	0	0	0	2.51e-12	8.09e-12	1.75e-05	4.99e-09	data	0
Proinflammatory mediators production and activation of basophils in asthma	0	0	0	0	0	0	0	2.51e-12	4.85e-09	1.75e-05	6.28e-07	data	0
Role of IFN-beta in activation of T cell apoptosis in multiple sclerosis	0	0	0	0	0	0	0	2.53e-12	4.4e-11	7.71e-10	0.000180857	data	0
Prostate Cancer: candidate susceptibility genes in inflammatory pathways	0	0	0	0	0	0	0	2.53e-12	8.47e-15	4.83e-11	5.38e-16	data	0
Immune response_CD16 signaling in NK cells	0	0	0	0	0	0	0	2.78e-12	1.51e-10	1.32e-05	0.00100105	data	0
Interaction of deficient alpha-MSH signaling with TNF-alpha in melanoma	0	0	0	0	0	0	0	3.08e-12	6.13e-11	0.00724647	1.56e-09	data	0
Stellate cells activation and liver fibrosis	0	0	0	0	0	0	0	4.1e-12	1.35e-14	4.39e-11	1.64e-09	data	0
Immune response_Inhibitory action of Lipoxins on pro-inflammatory TNF-alpha signaling	0	0	0	0	0	0	0	4.28e-12	1.25e-10	2.2e-05	7.11e-06	data	0
Growth factors in regulation of oligodendrocyte precursor cells survival in multiple sclerosis	0	0	0	0	0	0	0	5.22e-12	2.63e-06	1.62e-10	3.14e-07	data	0
Role of adipose tissue hypoxia in obesity and type 2 diabetes	0	0	0	0	0	0	0	5.42e-12	4.51e-17	1.3e-09	1.41e-07	data	0
Development_G-CSF-induced myeloid differentiation	0	0	0	0	0	0	0	5.42e-12	6.82e-06	0.000128751	0.00178126	data	0
Role of alpha-V/ beta-6 integrin in colorectal cancer	0	0	0	0	0	0	0	5.52e-12	7.14e-11	6.86e-09	3.25e-06	data	0
Role of Endothelin-1 in inflammation and vasoconstriction in Sickle cell disease	0	0	0	0	0	0	0	5.92e-12	8.43e-08	2.11e-05	0.000838047	data	0
Neutrophil chemotaxis in asthma	0	0	0	0	0	0	0	5.92e-12	1.99e-17	2.65e-11	8.49e-09	data	0
Role of FSH and Lutropin in ovarian cancer	0	0	0	0	0	0	0	6.15e-12	2.28e-10	0.00263205	0.00628812	data	0
Development_Cytokine-mediated regulation of megakaryopoiesis	0	0	0	0	0	0	0	9.56e-12	8.98e-14	1.86e-07	5.51e-12	data	0
Putative glucocorticoid- and LABA-mediated inhibition of pro-fibrotic signaling in airway fibroblasts/myofibroblasts	0	0	0	0	0	0	0	1.11e-11	1.48e-06	2.78e-06	2.84e-05	data	0
Transcription_HIF-1 targets	0	0	0	0	0	0	0	1.15e-11	4.48e-22	3.6e-09	1.87e-08	data	0
Plasminogen activators signaling in pancreatic cancer	0	0	0	0	0	0	0	1.16e-11	2.24e-10	1.25e-08	0.00359185	data	0
TNF-alpha and IL-1 beta induce hyperglycemia in obesity and type 2 diabetes in adipocytes	0	0	0	0	0	0	0	1.16e-11	2.01e-08	1.29e-07	6.82e-06	data	0
IL-6 signaling pathway in lung cancer	0	0	0	0	0	0	0	1.16e-11	2.24e-10	0.00215823	6.54e-05	data	0
Bacterial infections in CF airways	0	0	0	0	0	0	0	1.18e-11	4.78e-13	0.000179782	4.52e-12	data	0
Common mechanisms of Th17 cell migration	0	0	0	0	0	0	0	1.18e-11	3.25e-16	1.17e-07	1.52e-14	data	0
Role of integrins in eosinophil degranulation in asthma	0	0	0	0	0	0	0	1.47e-11	1.53e-13	2.39e-07	5.01e-05	data	0
TGF-beta 1-mediated induction of EMT in normal and asthmatic airway epithelium	0	0	0	0	0	0	0	1.54e-11	4.31e-13	2.81e-07	0.000295881	data	0
Putative pathways of MHC class I-dependent postsynaptic long-term depression in major depressive disorder	0	0	0	0	0	0	0	1.85e-11	5.12e-08	6.86e-06	3.68e-09	data	0
The role of UV radiation in melanoma development	0	0	0	0	0	0	0	1.89e-11	4.08e-12	7.93e-08	1.55e-08	data	0
Cornification of epithelium in dry eye	0	0	0	0	0	0	0	1.94e-11	3.48e-09	9.13e-06	1.98e-10	data	0
TGF-beta-induced fibroblast/ myofibroblast migration and extracellular matrix production in asthmatic airways	0	0	0	0	0	0	0	2.17e-11	3.75e-13	2.65e-05	0.000110698	data	0
Activation of ACTH production in pituitary gland in major depressive disorder	0	0	0	0	0	0	0	2.2e-11	1.8e-17	3.4e-09	1.8e-08	data	0
Signal transduction_Angiotensin II/ AGTR1 signaling via p38, ERK and PI3K	0	0	0	0	0	0	0	2.78e-11	2.1e-09	0.000201569	0.00894595	data	0
Mechanisms of drug resistance in SCLC	0	0	0	0	0	0	0	2.91e-11	3.55e-11	1.65e-08	6.48e-06	data	0
Pro-inflammatory action of Gastrin in gastric cancer	0	0	0	0	0	0	0	3.07e-11	1.11e-10	NA	0.000661475	data	0
VEGF signaling in multiple myeloma	0	0	0	0	0	0	0	3.07e-11	1.34e-11	0.000256416	1.77e-06	data	0
Modulation of tumor response to cytotoxic T cells by hypoxia in tumors	0	0	0	0	0	0	0	3.07e-11	1.48e-14	3.51e-10	8.81e-12	data	0
Cell adhesion_ECM remodeling	0	0	0	0	0	0	0	3.33e-11	9.53e-21	1.11e-07	3.24e-05	data	0
Immune response_T regulatory cell-mediated modulation of effector T cell and NK cell functions	0	0	0	0	0	0	0	3.33e-11	2.4e-12	0.000127124	5.69e-09	data	0
Immune response_Antigen presentation by MHC class I: cross-presentation	0	0	0	0	0	0	0	3.7e-11	1.58e-13	0.000741058	0.00278932	data	0
Immune response_Oncostatin M signaling via MAPK	0	0	0	0	0	0	0	3.89e-11	5.34e-08	0.00301272	0.000723669	data	0
A shift in alveolar macrophage phenotype in COPD	0	0	0	0	0	0	0	3.89e-11	5.34e-08	1.63e-05	9.51e-05	data	0
LRRK2 and immune function in Parkinson's disease	0	0	0	0	0	0	0	4.71e-11	1.13e-06	0.000100198	1.3e-07	data	0
Development_VEGF signaling and activation	0	0	0	0	0	0	0	5.54e-11	6.71e-08	5.4e-05	3.2e-06	data	0
Transcription_Role of AP-1 in regulation of cellular metabolism	0	0	0	0	0	0	0	6.86e-11	1.26e-09	3.6e-07	8.49e-09	data	0
Substance P-mediated inflammation and pain in Sickle cell disease	0	0	0	0	0	0	0	6.86e-11	1.07e-12	3.94e-08	8.39e-14	data	0
Signal transduction_AKT signaling	0	0	0	0	0	0	0	9.21e-11	6.42e-07	0.00172831	3.41e-05	data	0
Immune response_Substance P-stimulated expression of proinflammatory cytokines via MAPKs	0	0	0	0	0	0	0	9.21e-11	1.01e-07	6.71e-05	0.000255267	data	0
Signal transduction_mTORC2 downstream signaling	0	0	0	0	0	0	0	9.65e-11	3.23e-05	0.00306346	0.000908149	data	0
Blood coagulation_Blood coagulation	0	0	0	0	0	0	0	1.18e-10	2.36e-10	NA	NA	data	0
Autocrine Somatotropin signaling in breast cancer	0	0	0	0	0	0	0	1.18e-10	2.36e-10	NA	0.000965872	data	0
Regulatory T cells in murine model of contact hypersensitivity	0	0	0	0	0	0	0	1.46e-10	4.76e-13	2.52e-10	1.27e-16	data	0
Apoptosis and survival_FAS signaling cascades	0	0	0	0	0	0	0	1.5e-10	1.51e-07	1.39e-05	4.06e-05	data	0
Development_Inhibition of angiogenesis by PEDF	0	0	0	0	0	0	0	1.54e-10	2.13e-09	0.00527218	2.54e-06	data	0
NETosis in SLE	0	0	0	0	0	0	0	1.54e-10	2.14e-08	2.12e-09	2.84e-05	data	0
Alternative complement cascade disruption in age-related macular degeneration	0	0	0	0	0	0	0	1.54e-10	6.17e-05	2.12e-09	0.000266542	data	0
Mechanisms of drug resistance in multiple myeloma	0	0	0	0	0	0	0	1.7e-10	3.9e-09	1.56e-07	1.44e-08	data	0
Apoptosis and survival_Ceramides signaling pathway	0	0	0	0	0	0	0	1.99e-10	1.99e-07	0.000203305	2.07e-06	data	0
Immune response_Antigen presentation by MHC class II	0	0	0	0	0	0	0	2.07e-10	2.51e-06	5.03e-05	0.0250192	data	0
Role of free fatty acids in obesity and type 2 diabetes	0	0	0	0	0	0	0	2.42e-10	8.09e-12	1.75e-05	4.99e-09	data	0
LKB1 signaling pathway in lung cancer cells	0	0	0	0	0	0	0	2.42e-10	3.43e-08	0.00233919	5.87e-06	data	0
Development_Regulation of endothelial progenitor cell differentiation from adult stem cells	0	0	0	0	0	0	0	2.49e-10	4.28e-13	0.0138123	6.6e-05	data	0
IGF family signaling in colorectal cancer	0	0	0	0	0	0	0	2.49e-10	1.05e-06	1.27e-05	0.000386651	data	0
Immune response_Platelet activating factor/ PTAFR pathway signaling	0	0	0	0	0	0	0	2.64e-10	2.27e-07	0.0023161	4.41e-06	data	0
Epithelial cell apoptosis in COPD	0	0	0	0	0	0	0	2.85e-10	1.49e-05	3.85e-06	3.54e-05	data	0
Apoptosis and survival_Phosphorylation and acetylation in TNF-alpha-induced NF-kB signaling	0	0	0	0	0	0	0	3.3e-10	5.24e-05	0.000248332	0.00126601	data	0
Signal transduction_CXCR4 signaling via PI3K cascade	0	0	0	0	0	0	0	3.82e-10	3.22e-07	0.0103581	7.11e-06	data	0
Immune response_BAFF-induced signaling	0	0	0	0	0	0	0	4.01e-10	0.000157213	0.00133955	NA	data	0
Gamma-secretase regulation of osteogenesis	0	0	0	0	0	0	0	4.27e-10	2.48e-15	0.000106766	NA	data	0
Regulation and signaling of HGF receptor (Met) and MSP receptor (RON) in lung cancer	0	0	0	0	0	0	0	5.21e-10	1.8e-11	1.99e-07	0.00601447	data	0
Stromal-epithelial interaction in Prostate Cancer	0	0	0	0	0	0	0	5.35e-10	1.34e-10	1.03e-12	2.85e-05	data	0
Dysregulation of Adiponectin secretion from adipocytes in obesity, type 2 diabetes and metabolic syndrome X	0	0	0	0	0	0	0	7.16e-10	2.09e-05	0.00352653	NA	data	0
Apoptosis and survival_CXCR3-B signaling	0	0	0	0	0	0	0	7.4e-10	1.81e-12	1.88e-08	1.8e-13	data	0
Apoptosis and survival_TNF-alpha-induced Caspase-8 signaling	0	0	0	0	0	0	0	8.55e-10	2.28e-10	0.00715464	3.41e-05	data	0
Chemotaxis_CCL16-, CCL20-, CXCL16- and CCL25-mediated cell migration	0	0	0	0	0	0	0	8.55e-10	6.42e-07	0.02549	0.0387266	data	0
Chemotaxis_CXCR3-A signaling	0	0	0	0	0	0	0	8.77e-10	9e-10	0.000256543	1.04e-07	data	0
TLR and EGFR-induced inflammatory signaling in normal and asthmatic airway epithelium	0	0	0	0	0	0	0	8.9e-10	1.13e-06	0.000100198	1.3e-07	data	0
Expression targets of Tissue factor signaling in cancer	0	0	0	0	0	0	0	8.9e-10	2.72e-11	0.00524153	0.00373922	data	0
Apoptosis and survival_Caspase cascade	0	0	0	0	0	0	0	9.01e-10	1.2e-08	7.09e-06	5.4e-06	data	0
Apoptosis and survival_Cytoplasmic/mitochondrial transport of proapoptotic proteins Bid, Bmf and Bim	0	0	0	0	0	0	0	9.01e-10	7.61e-07	5.2e-05	5.37e-05	data	0
Role of CNTF and LIF in regulation of oligodendrocyte development in multiple sclerosis	0	0	0	0	0	0	0	1.04e-09	6.82e-06	0.000128751	2.25e-05	data	0
Signal transduction_Additional pathways of NF-kB activation (in the nucleus)	0	0	0	0	0	0	0	1.04e-09	0.00117053	NA	0.000220441	data	0
Cell cycle progression in Prostate Cancer	0	0	0	0	0	0	0	1.18e-09	1.31e-07	0.000165275	0.00578019	data	0
Transcription_Role of VDR in regulation of genes involved in osteoporosis	0	0	0	0	0	0	0	1.2e-09	7.89e-10	6.29e-09	5.76e-05	data	0
Schema: Initiation of T cell recruitment in allergic contact dermatitis	0	0	0	0	0	0	0	1.36e-09	1.05e-08	1.04e-08	1.22e-09	data	0
Role and regulation of Prostaglandin E2 in gastric cancer	0	0	0	0	0	0	0	1.38e-09	4.75e-06	0.000994731	1.23e-05	data	0
Demyelination in multiple sclerosis	0	0	0	0	0	0	0	1.38e-09	5.36e-10	7.14e-06	1.53e-07	data	0
Role of osteoblasts in bone lesions formation in multiple myeloma	0	0	0	0	0	0	0	1.54e-09	4.06e-16	1.29e-07	6.82e-06	data	0
Apoptosis and survival_Role of IAP-proteins in apoptosis	0	0	0	0	0	0	0	1.87e-09	1.89e-07	2.12e-09	2.84e-05	data	0
Neutrophil adhesion and transendothelial migration in asthma	0	0	0	0	0	0	0	1.87e-09	1.88e-10	2.9e-07	1.93e-07	data	0
HCV-dependent regulation of membrane receptors signaling in HCC	0	0	0	0	0	0	0	2.04e-09	2.04e-08	6.41e-07	7.93e-07	data	0
Th2-cytokines and IFN-mediated regulation of airway smooth muscle contraction	0	0	0	0	0	0	0	2.04e-09	2.05e-07	3.98e-09	7.93e-07	data	0
Apoptosis and survival_HTR1A signaling	0	0	0	0	0	0	0	2.07e-09	0.000479162	0.0487389	1.77e-06	data	0
Immune response_Function of MEF2 in T lymphocytes	0	0	0	0	0	0	0	2.07e-09	2.95e-05	0.0487389	NA	data	0
IGF-1 signaling in multiple myeloma	0	0	0	0	0	0	0	2.07e-09	2.3e-07	5.06e-05	NA	data	0
Retinal ganglion cell damage in glaucoma	0	0	0	0	0	0	0	2.08e-09	2.22e-07	2.71e-06	4.81e-05	data	0
Chemotaxis_Lysophosphatidic acid signaling via GPCRs	0	0	0	0	0	0	0	2.4e-09	1.34e-08	0.00136992	3.05e-05	data	0
Immune response _IFN gamma signaling pathway	0	0	0	0	0	0	0	2.79e-09	3.16e-05	0.000666108	0.000238128	data	0
Main growth factor signaling cascades in multiple myeloma cells	0	0	0	0	0	0	0	3.02e-09	5.24e-05	0.00547179	0.00716729	data	0
Development_PDGF signaling via STATs and NF-kB	0	0	0	0	0	0	0	3.27e-09	1.49e-05	0.000210482	2.62e-07	data	0
Signal transduction_Adenosine A1 receptor signaling pathway	0	0	0	0	0	0	0	3.41e-09	3.25e-05	0.00530943	0.00048514	data	0
Regulation of Beta-catenin activity in melanoma	0	0	0	0	0	0	0	3.79e-09	2.83e-10	9.13e-06	0.000147105	data	0
Influence of bone marrow cell environment on progression of multiple myeloma	0	0	0	0	0	0	0	4.48e-09	1.32e-08	1.38e-05	0.000139965	data	0
Inhibition of GTPase prenylation by statins in asthma and COPD	0	0	0	0	0	0	0	4.7e-09	1.42e-05	NA	0.000219262	data	0
Transcription targets of Androgen receptor involved in Prostate Cancer	0	0	0	0	0	0	0	4.7e-09	1.34e-10	1.72e-08	1.42e-10	data	0
IL-1 production in melanoma	0	0	0	0	0	0	0	4.71e-09	1.53e-09	1.44e-05	3.01e-07	data	0
Schema: Immunoregulatory cells in dry eye	0	0	0	0	0	0	0	4.74e-09	2.29e-08	1.65e-10	8.97e-11	data	0
Neuroprotective action of lithium	0	0	0	0	0	0	0	4.75e-09	2.41e-06	0.000104076	0.00263107	data	0
Development_TGF-beta-dependent induction of EMT via MAPK	0	0	0	0	0	0	0	4.76e-09	2.43e-11	0.000725603	0.000449697	data	0
Immune response_KLRK1 (NKG2D) signaling pathway	0	0	0	0	0	0	0	4.76e-09	5.91e-05	0.0116269	NA	data	0
Mucin expression in CF airways	0	0	0	0	0	0	0	5.26e-09	2.65e-08	0.000983825	0.00440658	data	0
Role of microRNAs in cell proliferation in colorectal cancer	0	0	0	0	0	0	0	5.26e-09	2.62e-06	3.83e-12	NA	data	0
Immune response_M-CSF-receptor signaling pathway	0	0	0	0	0	0	0	5.55e-09	2.79e-06	0.0280778	0.010491	data	0
Role of metalloproteases and heparanase in progression of pancreatic cancer	0	0	0	0	0	0	0	5.56e-09	6.91e-10	5.26e-06	0.0027571	data	0
IL-6 signaling in tumor-associated monocytes/macrophages in breast cancer	0	0	0	0	0	0	0	5.74e-09	3.22e-08	4.67e-05	5.74e-08	data	0
TLRs-mediated IFN-alpha production by plasmacytoid dendritic cells in SLE	0	0	0	0	0	0	0	6.48e-09	3.04e-09	0.000421318	3.6e-07	data	0
Eosinophil chemotaxis in asthma	0	0	0	0	0	0	0	6.55e-09	5.81e-16	3.46e-09	2.61e-06	data	0
Immune response_Role of integrins in NK cells cytotoxicity	0	0	0	0	0	0	0	6.75e-09	8.43e-08	0.000737284	1.3e-06	data	0
Stem cells_Role of TGF-beta 1 in fibrosis development after myocardial infarction	0	0	0	0	0	0	0	6.75e-09	1.26e-11	3.94e-08	0.00516297	data	0
Defective efferocytosis in COPD	0	0	0	0	0	0	0	6.75e-09	1.26e-09	0.0144286	0.0259891	data	0
IgE-dependent production of pro-inflammatory mediators by neutrophils in asthma	0	0	0	0	0	0	0	6.75e-09	2.09e-05	0.0497888	NA	data	0
Apoptosis and survival_p53-dependent apoptosis	0	0	0	0	0	0	0	6.81e-09	3e-05	NA	0.00152113	data	0
Immune response_CD137 signaling in immune cell	0	0	0	0	0	0	0	6.81e-09	6.62e-08	1.38e-06	1.77e-05	data	0
Role of platelets in the initiation of in-stent restenosis	0	0	0	0	0	0	0	7.22e-09	2.49e-11	6.71e-05	1.98e-10	data	0
Role of platelets in allograft rejection	0	0	0	0	0	0	0	7.22e-09	1.91e-09	1.1e-05	2.81e-09	data	0
Development_Glucocorticoid receptor signaling	0	0	0	0	0	0	0	7.46e-09	6.34e-08	0.00166457	6.05e-06	data	0
Inhibition of neutrophil migration by proresolving lipid mediators in COPD	0	0	0	0	0	0	0	9.57e-09	2.7e-15	1.29e-07	1.07e-14	data	0
Transcription_P53 signaling pathway	0	0	0	0	0	0	0	1.06e-08	8.76e-07	0.0163057	0.000135008	data	0
Apoptosis and survival_Inhibition of ROS-induced apoptosis by 17beta-estradiol	0	0	0	0	0	0	0	1.09e-08	2.59e-05	0.00812689	4.06e-05	data	0
Development_PDGF signaling via MAPK cascades	0	0	0	0	0	0	0	1.1e-08	2.14e-07	1.27e-05	0.000386651	data	0
Cigarette smoke-induced oxidative stress and apoptosis in airway epithelial cells	0	0	0	0	0	0	0	1.1e-08	4.81e-06	0.00425162	9.96e-06	data	0
Populations of skin dendritic cells involved in contact hypersensitivity	0	0	0	0	0	0	0	1.13e-08	7.22e-08	1.04e-07	0.00171876	data	0
Development_Role of proteases in hematopoietic stem cell mobilization	0	0	0	0	0	0	0	1.13e-08	7.22e-08	0.000240216	0.000143788	data	0
Anti-apoptotic action of Gastrin in pancreatic cancer	0	0	0	0	0	0	0	1.5e-08	1.62e-07	NA	0.000531311	data	0
HBV-dependent NF-kB and PI3K/AKT pathways leading to HCC	0	0	0	0	0	0	0	1.5e-08	1.55e-13	0.00461187	1.91e-07	data	0
Immune response_Inflammasome in inflammatory response	0	0	0	0	0	0	0	1.5e-08	2.24e-09	9.46e-06	6.82e-06	data	0
Role of adhesion of SCLC cells in tumor progression	0	0	0	0	0	0	0	1.5e-08	2.24e-09	0.00970563	6.09e-07	data	0
Role of inhibition of WNT signaling in the progression of lung cancer	0	0	0	0	0	0	0	2.01e-08	0.000327384	0.022805	0.0130303	data	0
Inhibition of TGF-beta signaling in lung cancer	0	0	0	0	0	0	0	2.01e-08	1.48e-06	0.00016551	0.000266542	data	0
Arachidonic acid metabolites production in alveolar macrophages in asthma	0	0	0	0	0	0	0	2.01e-08	2.13e-09	2.31e-05	7.21e-10	data	0
Development_Gastrin in cell growth and proliferation	0	0	0	0	0	0	0	2.09e-08	0.000422152	0.0460789	NA	data	0
Immune response_Gastrin in inflammatory response	0	0	0	0	0	0	0	2.22e-08	2.04e-06	NA	0.0157542	data	0
Development_EPO-induced Jak-STAT pathway	0	0	0	0	0	0	0	2.39e-08	2.54e-07	1.25e-05	7.91e-05	data	0
K-RAS signaling in lung cancer	0	0	0	0	0	0	0	2.4e-08	1.25e-10	0.000615258	7.11e-06	data	0
Role of IL-8 in colorectal cancer	0	0	0	0	0	0	0	2.48e-08	2.42e-11	4.67e-10	3.33e-08	data	0
Signaling Transduction_Role of MIF as an intracellular mediator	0	0	0	0	0	0	0	2.5e-08	5.8e-09	0.00125092	2.46e-07	data	0
Apoptosis and survival_Phosphorylation in TNF-alpha-induced NF-kB signaling	0	0	0	0	0	0	0	2.5e-08	7.66e-11	0.0205515	2.37e-05	data	0
Lysophospholipid mediators-induced inflammatory signaling in normal and asthmatic airway epithelium	0	0	0	0	0	0	0	2.57e-08	4.03e-05	0.000177892	4.35e-05	data	0
HCV-mediated liver damage and predisposition to HCC via cell stress	0	0	0	0	0	0	0	2.84e-08	5.91e-10	0.000443915	3.3e-08	data	0
Signal transduction_Additional pathways of NF-kB activation (in the cytoplasm)	0	0	0	0	0	0	0	3.06e-08	2.36e-06	NA	0.000841857	data	0
Development_Transcription regulation of granulocyte development	0	0	0	0	0	0	0	3.32e-08	2.28e-06	0.0258796	0.000319889	data	0
Stem cells_Role of Ceramide 1-phosphate, Sphingosine 1-phosphate and Complement cascade in hematopoietic stem cell homing	0	0	0	0	0	0	0	3.32e-08	0.000437017	3.06e-05	0.000319889	data	0
Upregulation of IL-8 expression in colorectal cancer	0	0	0	0	0	0	0	3.32e-08	3.68e-08	0.000210482	1.07e-09	data	0
Role of proinflammatory cytokines in activation of p53 in major depressive disorder	0	0	0	0	0	0	0	3.49e-08	1.29e-05	2.73e-05	6.85e-10	data	0
Development_Growth factors in regulation of oligodendrocyte precursor cell survival	0	0	0	0	0	0	0	3.73e-08	0.00153806	2.72e-08	0.000723669	data	0
Apoptosis and survival_Anti-apoptotic action of nuclear ESR1 and ESR2	0	0	0	0	0	0	0	3.73e-08	2.56e-06	0.00301272	1.06e-05	data	0
Role of red blood cell adhesion to endothelium in vaso-occlusion in Sickle cell disease	0	0	0	0	0	0	0	3.73e-08	6.57e-09	0.00301272	1.06e-05	data	0
FAK1 signaling in melanoma	0	0	0	0	0	0	0	3.75e-08	1.17e-09	0.0229316	0.000219262	data	0
Notch signaling in breast cancer	0	0	0	0	0	0	0	4.3e-08	8.28e-16	1.7e-05	0.00479033	data	0
IL-6 signaling in breast cancer cells	0	0	0	0	0	0	0	4.3e-08	7.32e-12	8.92e-05	2.25e-11	data	0
Chemotaxis_CCR1 signaling	0	0	0	0	0	0	0	4.3e-08	1.47e-05	0.00662045	0.000160619	data	0
HGF signaling in pancreatic cancer	0	0	0	0	0	0	0	4.31e-08	3.48e-09	0.00308996	0.000147105	data	0
Development_Role of CNTF and LIF in regulation of oligodendrocyte development	0	0	0	0	0	0	0	4.31e-08	2.03e-05	0.000525802	0.000147105	data	0
Apoptosis and survival_Regulation of Apoptosis by Mitochondrial Proteins	0	0	0	0	0	0	0	5.35e-08	0.00244819	4.01e-05	4.38e-05	data	0
Th2-cytokines-induced expression of mucins in asthma	0	0	0	0	0	0	0	5.55e-08	1.01e-07	2.43e-08	3.94e-06	data	0
Role of Insulin in regulation of eating behavior in obesity	0	0	0	0	0	0	0	5.55e-08	3.7e-06	NA	0.000255267	data	0
Bone metastases in Prostate Cancer	0	0	0	0	0	0	0	7.26e-08	1.32e-17	1.26e-05	0.000180857	data	0
K-RAS signaling in pancreatic cancer	0	0	0	0	0	0	0	8.1e-08	9.23e-07	8.27e-05	5.02e-07	data	0
Immune response_CRTH2 signaling in Th2 cells	0	0	0	0	0	0	0	8.1e-08	1.51e-07	8.27e-05	5.02e-07	data	0
Development_The role of GDNF ligand family/ RET receptor in cell survival, growth and proliferation	0	0	0	0	0	0	0	8.51e-08	1.82e-09	NA	0.00167933	data	0
HIV-1 signaling via CCR5 in macrophages and T lymphocytes	0	0	0	0	0	0	0	8.64e-08	8.76e-07	0.000884899	0.000135008	data	0
Development_Cross-talk between VEGF and Angiopoietin 1 signaling pathways	0	0	0	0	0	0	0	9.08e-08	6.36e-07	0.00166457	6.05e-06	data	0
HBV-dependent transcription regulation leading to HCC	0	0	0	0	0	0	0	9.08e-08	5.48e-06	0.000245491	0.00602666	data	0
Development_Keratinocyte differentiation	0	0	0	0	0	0	0	1.13e-07	0.000125227	0.0284776	NA	data	0
Role of DNA methylation in progression of multiple myeloma	0	0	0	0	0	0	0	1.17e-07	4.85e-09	1.75e-05	0.000341525	data	0
Stem cells_Neovascularization of glioblastoma in response to hypoxia	0	0	0	0	0	0	0	1.19e-07	9.38e-07	NA	0.000220441	data	0
Immune responses in asthma (schema)	0	0	0	0	0	0	0	1.25e-07	4.28e-07	2.08e-05	1.2e-06	data	0
Development_Growth hormone signaling via STATs and PLC/IP3	0	0	0	0	0	0	0	1.31e-07	2.01e-08	9.46e-06	0.000531311	data	0
Inflammatory factors-induced expression of mucins in normal and asthmatic epithelium	0	0	0	0	0	0	0	1.4e-07	5.61e-08	3.63e-08	2.08e-09	data	0
Stem cells_Hypothetical role of microRNAs in fibrosis development after myocardial infarction	0	0	0	0	0	0	0	1.57e-07	1.08e-06	0.00206775	NA	data	0
Role of GIP in pathogenesis of type 2 diabetes	0	0	0	0	0	0	0	1.66e-07	4.53e-05	NA	0.0116173	data	0
Inhibition of RUNX3 signaling in gastric cancer	0	0	0	0	0	0	0	1.86e-07	7.92e-09	0.000100198	0.000400483	data	0
Origin of Langerhans cells in the steady-state and under inflammatory conditions	0	0	0	0	0	0	0	1.86e-07	5.09e-10	0.000100198	3.39e-05	data	0
Role of inflammasome in macrophages, adipocytes and pancreatic beta cells in type 2 diabetes	0	0	0	0	0	0	0	1.88e-07	4.21e-09	2.26e-05	4.8e-07	data	0
Fibroblast differentiation to myofibroblasts in asthmatic airways	0	0	0	0	0	0	0	1.9e-07	1.48e-06	0.00101577	0.00207256	data	0
Signal transduction_Adenosine A2A receptor signaling pathway	0	0	0	0	0	0	0	1.93e-07	2.01e-09	0.000358663	2.59e-06	data	0
Signal transduction_Activation of PKC via G-Protein coupled receptor	0	0	0	0	0	0	0	1.93e-07	0.000197009	NA	NA	data	0
IGF signaling in HCC	0	0	0	0	0	0	0	1.93e-07	4.39e-12	3.51e-07	2.59e-06	data	0
HBV signaling via protein kinases leading to HCC	0	0	0	0	0	0	0	1.99e-07	2.54e-07	8.48e-05	0.0040709	data	0
Th2-cytokine-induced airway epithelium mucous metaplasia in COPD	0	0	0	0	0	0	0	2.02e-07	0.000544686	0.0321616	0.00477382	data	0
Signal transduction_Leptin signaling in non-neuronal cells	0	0	0	0	0	0	0	2.06e-07	0.0001921	0.000886828	7.27e-06	data	0
HGF signaling in colorectal cancer	0	0	0	0	0	0	0	2.09e-07	1.45e-07	0.000121987	0.0420007	data	0
Brca1 in ovarian cancer	0	0	0	0	0	0	0	2.62e-07	2.04e-08	5.63e-05	5e-08	data	0
Regulation of VEGF signaling in pancreatic cancer	0	0	0	0	0	0	0	2.62e-07	2.05e-07	0.0025405	7.93e-07	data	0
Development_Role of IL-8 in angiogenesis	0	0	0	0	0	0	0	2.74e-07	6.29e-05	0.0216337	2.07e-05	data	0
Th2 cytokine-induced alternative activation of alveolar macrophages in asthma	0	0	0	0	0	0	0	2.98e-07	2.24e-12	4.21e-07	1.8e-08	data	0
Apoptosis and survival_IL-17-induced CIKS-dependent MAPK signaling pathways	0	0	0	0	0	0	0	2.98e-07	3.08e-07	NA	3.54e-05	data	0
Development_Thrombopoietin signaling via JAK-STAT pathway	0	0	0	0	0	0	0	3.32e-07	1.68e-05	1.5e-05	4.47e-05	data	0
Immune response_T regulatory cell-mediated modulation of antigen-presenting cell functions	0	0	0	0	0	0	0	3.56e-07	1.01e-08	4.01e-08	2.22e-15	data	0
Immune response_Antigen presentation by MHC class I, classical pathway	0	0	0	0	0	0	0	3.57e-07	0.000303149	NA	0.000183718	data	0
Environmental factors-induced inflammatory signaling in normal and asthmatic airway epithelium	0	0	0	0	0	0	0	3.88e-07	6.42e-07	6.71e-05	3.98e-07	data	0
IGF family, invasion and metastasis in colorectal cancer	0	0	0	0	0	0	0	4.57e-07	6.92e-09	NA	0.0161758	data	0
Immune response_Fc epsilon RI pathway: signaling through Fyn and PI3K	0	0	0	0	0	0	0	4.81e-07	6.23e-06	NA	0.00949994	data	0
Immune response_IL-13 signaling via JAK-STAT	0	0	0	0	0	0	0	5.46e-07	2.25e-08	2.81e-07	4.82e-06	data	0
Transition of HCC cells to invasive and migratory phenotype	0	0	0	0	0	0	0	5.46e-07	4.53e-12	0.000435486	4.06e-05	data	0
The role of PTEN and PI3K signaling in melanoma	0	0	0	0	0	0	0	6.13e-07	3.85e-08	0.000256416	0.0163075	data	0
Role of neurotrophins in activation of p53 in major depressive disorder	0	0	0	0	0	0	0	6.33e-07	5.29e-06	3.88e-06	0.000965872	data	0
Apoptosis and survival_Ubiquitination and phosphorylation in TNF-alpha-induced NF-kB signaling	0	0	0	0	0	0	0	6.33e-07	5.29e-06	0.000165275	1.61e-05	data	0
Apoptosis and survival_Endoplasmic reticulum stress response pathway	0	0	0	0	0	0	0	6.39e-07	7.36e-06	0.0284776	0.00131783	data	0
Signal transduction_Erk Interactions: Inhibition of Erk	0	0	0	0	0	0	0	6.87e-07	0.0337918	NA	NA	data	0
Th2 cell migration in asthma	0	0	0	0	0	0	0	6.87e-07	9.99e-12	8.23e-09	4.65e-07	data	0
Intercellular relations in asthma (general schema)	0	0	0	0	0	0	0	6.89e-07	2.16e-07	8.9e-06	4.24e-06	data	0
Apoptosis and survival_NGF activation of NF-kB	0	0	0	0	0	0	0	9.05e-07	2.8e-08	0.0010553	1.96e-05	data	0
Zinc deficiency in Prostate Cancer	0	0	0	0	0	0	0	9.47e-07	0.000255646	0.000245491	6.05e-06	data	0
Immune response_LPS-induced platelet activation	0	0	0	0	0	0	0	9.47e-07	6.36e-07	0.00166457	7.46e-05	data	0
Cell adhesion_Plasmin signaling	0	0	0	0	0	0	0	1.02e-06	1.62e-07	0.000408739	0.000531311	data	0
Mechanisms of CAM-DR in multiple myeloma	0	0	0	0	0	0	0	1.02e-06	0.000961704	0.0366401	0.00359185	data	0
Role of growth factor receptors transactivation by Hyaluronic acid / CD44 signaling in tumor progression	0	0	0	0	0	0	0	1.02e-06	7.44e-06	0.000408739	NA	data	0
DNA damage_Brca1 as a transcription regulator	0	0	0	0	0	0	0	1.05e-06	6.82e-06	NA	2.25e-05	data	0
FGF signaling in pancreatic cancer	0	0	0	0	0	0	0	1.05e-06	9.57e-06	0.0342809	0.00232717	data	0
Regulation of IGF family activity in colorectal cancer	0	0	0	0	0	0	0	1.05e-06	4.23e-13	0.000128751	2.25e-05	data	0
G-protein signaling_Proinsulin C-peptide signaling	0	0	0	0	0	0	0	1.11e-06	0.000197009	NA	NA	data	0
Effect of H. pylori infection on gastric epithelial cell proliferation	0	0	0	0	0	0	0	1.11e-06	1.24e-05	NA	0.0291164	data	0
Development_Role of G-CSF in hematopoietic stem cell mobilization	0	0	0	0	0	0	0	1.22e-06	3.54e-09	0.000612076	2.53e-05	data	0
Muscle contraction_Regulation of eNOS activity in endothelial cells	0	0	0	0	0	0	0	1.36e-06	1.96e-07	NA	NA	data	0
Signal transduction_JNK pathway	0	0	0	0	0	0	0	1.43e-06	5.91e-05	0.0116269	0.0126905	data	0
Cytoskeleton remodeling_Keratin filaments	0	0	0	0	0	0	0	1.48e-06	NA	NA	0.0217209	data	0
Development_Insulin, IGF-1 and TNF-alpha in brown adipocyte differentiation	0	0	0	0	0	0	0	1.48e-06	1.47e-05	0.00662045	NA	data	0
Higher ESR1 / ESR2 ratio in breast cancer	0	0	0	0	0	0	0	1.48e-06	1.74e-06	0.0407538	0.000621745	data	0
PR action in breast cancer: stimulation of cell growth and proliferation	0	0	0	0	0	0	0	1.48e-06	1.07e-05	1.25e-05	0.000621745	data	0
Downregulation of MITF in melanoma	0	0	0	0	0	0	0	1.53e-06	0.000359062	0.000320628	0.000906799	data	0
Signal transduction_WNT/Beta-catenin signaling in tissue homeostasis	0	0	0	0	0	0	0	1.78e-06	4.41e-07	0.000301324	0.000219262	data	0
Oxidative stress_Role of Sirtuin1 and PGC1-alpha in activation of antioxidant defense system	0	0	0	0	0	0	0	1.88e-06	0.000287867	0.0138123	NA	data	0
Inhibition of GSK3 beta by lithium in major depressive disorder	0	0	0	0	0	0	0	2.08e-06	8.04e-05	8.78e-07	0.00373922	data	0
FGFR3 signaling in multiple myeloma	0	0	0	0	0	0	0	2.12e-06	1.5e-05	0.000610142	0.000723669	data	0
Down-regulation of mast cell functions through ITIM-containing inhibitory receptors in asthma	0	0	0	0	0	0	0	2.12e-06	0.00153806	0.0127072	NA	data	0
Regulation of immune cell differentiation by Notch signaling	0	0	0	0	0	0	0	2.45e-06	2.28e-10	2.08e-07	0.000255267	data	0
Type 2 diabetes (general schema)	0	0	0	0	0	0	0	2.53e-06	6.43e-07	4.67e-05	0.000618052	data	0
Tau pathology in Alzheimer disease	0	0	0	0	0	0	0	2.56e-06	0.0110713	0.0023161	NA	data	0
CHDI_DEGs from Replication data_Causal network	0	0	0	0	0	0	0	2.57e-06	0.000118438	NA	0.0339635	data	0
Arachidonic acid metabolites production in eosinophils in asthma	0	0	0	0	0	0	0	3.34e-06	3.82e-10	0.00201561	4.06e-05	data	0
Role of Leptin in regulation of eating behavior in obesity	0	0	0	0	0	0	0	3.43e-06	0.000737677	0.00103929	0.0300659	data	0
Chemotaxis_CCL19- and CCL21-mediated chemotaxis	0	0	0	0	0	0	0	3.45e-06	0.00907293	NA	0.000381252	data	0
Tumor-stroma interactions in pancreatic cancer	0	0	0	0	0	0	0	3.67e-06	1.99e-11	0.000525802	0.00909347	data	0
Apoptosis and survival_IL-17-induced CIKS-dependent NF-kB signaling and mRNA stabilization	0	0	0	0	0	0	0	3.67e-06	0.000125388	NA	0.000147105	data	0
Role of tumor microenvironment in plexiform neurofibroma formation in neurofibromatosis type 1	0	0	0	0	0	0	0	4.17e-06	5.29e-06	0.000884899	0.00578019	data	0
Skeletal muscle atrophy in COPD	0	0	0	0	0	0	0	4.3e-06	0.000155573	0.0102498	0.0068556	data	0
Role of nicotine in pathogenesis of SCLC	0	0	0	0	0	0	0	4.3e-06	9.59e-06	3.7e-05	4.35e-05	data	0
Stem cells_Signaling pathways in embryonic hepatocyte maturation	0	0	0	0	0	0	0	4.52e-06	8.51e-06	0.00522068	NA	data	0
Apoptosis and survival_Role of CDK5 in neuronal death and survival	0	0	0	0	0	0	0	4.96e-06	3.04e-05	0.000330556	5.37e-05	data	0
Development_Ligand-dependent activation of the ESR1/AP-1 pathway	0	0	0	0	0	0	0	5.06e-06	0.000191582	0.0425131	NA	data	0
Immune response_Regulatory role of C1q in platelet activation	0	0	0	0	0	0	0	5.06e-06	1.9e-05	0.000815171	0.000823064	data	0
Prolactin/ JAK2 signaling in breast cancer	0	0	0	0	0	0	0	5.46e-06	0.000178178	0.00774693	0.00518249	data	0
Suppression of TGF-beta signaling in pancreatic cancer	0	0	0	0	0	0	0	5.5e-06	3e-05	0.000661603	0.00152113	data	0
Development_WNT/Beta-catenin and NOTCH in induction of osteogenesis	0	0	0	0	0	0	0	5.74e-06	4.11e-10	0.00475116	NA	data	0
CHDI_Correlations from Replication data_Causal network (negative correlations)	0	0	0	0	0	0	0	5.74e-06	0.000183604	NA	NA	data	0
Development_TGF-beta-dependent induction of EMT via RhoA, PI3K and ILK	0	0	0	0	0	0	0	6.02e-06	0.000758804	0.0103581	7.11e-06	data	0
Signal transduction_Calcium signaling	0	0	0	0	0	0	0	6.02e-06	0.00837946	NA	NA	data	0
Blood coagulation_Platelet microparticle generation	0	0	0	0	0	0	0	6.7e-06	2.06e-05	NA	5.15e-05	data	0
Role of epigenetic alterations in proliferation and differentiation of SCLC cells	0	0	0	0	0	0	0	6.7e-06	0.000244775	0.00466987	NA	data	0
Reactive oxygen and nitrogen species production in eosinophils in asthma	0	0	0	0	0	0	0	7.02e-06	4.94e-09	0.00101784	0.000343898	data	0
Development_Angiopoietin - Tie2 signaling	0	0	0	0	0	0	0	7.02e-06	2.24e-09	0.00970563	0.000531311	data	0
Extracellular matrix-regulated proliferation of airway smooth muscle cells in asthma	0	0	0	0	0	0	0	7.02e-06	4.24e-05	NA	NA	data	0
Immune response_TLR ligands	0	0	0	0	0	0	0	7.02e-06	7.44e-06	0.000408739	6.82e-06	data	0
Protein folding and maturation_Insulin processing	0	0	0	0	0	0	0	7.6e-06	3.22e-05	NA	NA	data	0
Development_Role of HDAC and calcium/calmodulin-dependent kinase (CaMK) in control of skeletal myogenesis	0	0	0	0	0	0	0	7.64e-06	0.000874402	NA	NA	data	0
Development_Adenosine A3 receptor signaling	0	0	0	0	0	0	0	7.64e-06	0.000245188	NA	0.0205522	data	0
Fibroblast/ myofibroblast proliferation in asthmatic airways	0	0	0	0	0	0	0	7.82e-06	5.8e-09	9.06e-07	0.00716729	data	0
Transcription_Ligand-dependent activation of the ESR1/SP pathway	0	0	0	0	0	0	0	8.08e-06	0.017662	NA	NA	data	0
c-Myc in multiple myeloma	0	0	0	0	0	0	0	9.43e-06	3.09e-06	0.00872134	7.7e-05	data	0
Development_Thrombospondin 1 signaling	0	0	0	0	0	0	0	9.79e-06	5.83e-05	0.0407538	0.0040709	data	0
Upregulation of MITF in melanoma	0	0	0	0	0	0	0	9.79e-06	0.000283746	0.00255818	NA	data	0
Endothelial cell apoptosis in COPD	0	0	0	0	0	0	0	9.79e-06	1.74e-06	0.0111351	7.91e-05	data	0
NRF2 regulation of oxidative stress response	0	0	0	0	0	0	0	9.83e-06	NA	0.00741861	NA	data	0
Role of TNF-alpha in type 2 diabetes in skeletal muscle cells	0	0	0	0	0	0	0	1.05e-05	0.00424462	0.00627128	0.00794119	data	0
Development_Adiponectin signaling	0	0	0	0	0	0	0	1.05e-05	1.71e-05	0.0411092	NA	data	0
Muscle contraction_Relaxin signaling pathway	0	0	0	0	0	0	0	1.05e-05	0.000310284	0.0130044	0.00290031	data	0
Neuropeptide signaling in pancreatic cancer	0	0	0	0	0	0	0	1.05e-05	0.00379808	0.00355876	0.000513178	data	0
Possible regulation of HSF-1/ chaperone pathway in Huntington's disease	0	0	0	0	0	0	0	1.24e-05	0.0394768	0.00423301	NA	data	0
Stem cells_Fetal brown fat cell differentiation	0	0	0	0	0	0	0	1.26e-05	0.000372462	NA	NA	data	0
PGE2 pathways in cancer	0	0	0	0	0	0	0	1.26e-05	5.61e-06	0.0023161	0.000209478	data	0
Aberrant B-Raf signaling in melanoma progression	0	0	0	0	0	0	0	1.26e-05	0.00126696	NA	NA	data	0
Development_NOTCH1-mediated pathway for NF-KB activity modulation	0	0	0	0	0	0	0	1.28e-05	0.000359062	NA	0.041352	data	0
Development_G-CSF signaling	0	0	0	0	0	0	0	1.36e-05	4.75e-06	0.000994731	1.23e-05	data	0
EML4/ALK fusion protein in nonsmoking-related lung cancer	0	0	0	0	0	0	0	1.65e-05	3.08e-07	NA	0.000319889	data	0
Involvement of VEGF signaling in the progression of lung cancer	0	0	0	0	0	0	0	1.66e-05	4.82e-07	0.010932	0.013166	data	0
Transition of Smoldering multiple myeloma to active multiple myeloma (schema)	0	0	0	0	0	0	0	1.66e-05	1.53e-09	9.92e-07	1.13e-08	data	0
Transport_The role of AVP in regulation of Aquaporin 2 and renal water reabsorption	0	0	0	0	0	0	0	1.76e-05	0.0150722	NA	0.00357295	data	0
Cell adhesion_Cell-matrix glycoconjugates	0	0	0	0	0	0	0	1.83e-05	3.71e-06	0.000737284	0.00516297	data	0
Role of Huntingtin in regulation of BDNF in Huntington's disease	0	0	0	0	0	0	0	1.95e-05	0.00284428	NA	NA	data	0
T regulatory cell migration in asthma	0	0	0	0	0	0	0	1.95e-05	1.04e-05	0.000804031	0.000400483	data	0
MicroRNAs in melanoma	0	0	0	0	0	0	0	2.01e-05	0.00055232	3.7e-05	NA	data	0
CHDI_Correlations from Replication data_Cytoskeleton and adhesion module	0	0	0	0	0	0	0	2.16e-05	6.98e-07	0.0198653	0.000110698	data	0
Stem cells_Stimulation of differentiation of mouse embryonic fibroblasts into adipocytes by extracellular factors	0	0	0	0	0	0	0	2.22e-05	6.03e-05	0.0346236	NA	data	0
HIF-1 in gastric cancer	0	0	0	0	0	0	0	2.25e-05	2.23e-11	0.0178357	0.000747372	data	0
Apoptosis and survival_Granzyme B signaling	0	0	0	0	0	0	0	2.31e-05	0.000575485	NA	0.0027571	data	0
p53 signaling in Prostate Cancer	0	0	0	0	0	0	0	2.31e-05	2.15e-05	0.00150408	0.0161758	data	0
Stem cells_SDF-1 axis in endothelial progenitor cell recruitment in healing myocardial infarction	0	0	0	0	0	0	0	2.31e-05	2.15e-05	0.0292069	0.0161758	data	0
FGF2 signaling in melanoma	0	0	0	0	0	0	0	2.46e-05	5.29e-06	0.0163057	0.0282987	data	0
HGF signaling in melanoma	0	0	0	0	0	0	0	2.46e-05	5.29e-06	0.00410438	0.00578019	data	0
Atorvastatin in treatment of type 2 diabetes and metabolic syndrome X	0	0	0	0	0	0	0	2.46e-05	0.00812183	NA	NA	data	0
NF-AT signaling in cardiac hypertrophy	0	0	0	0	0	0	0	2.66e-05	6.29e-05	NA	NA	data	0
Development_TGF-beta receptor signaling	0	0	0	0	0	0	0	2.86e-05	0.0479604	0.00588901	NA	data	0
Stem cells_MMP-14-induced COX-2 expression in glioblastoma stem cells	0	0	0	0	0	0	0	2.99e-05	1.68e-05	NA	0.00442131	data	0
Action of GSK3 beta in bipolar disorder	0	0	0	0	0	0	0	2.99e-05	0.000121285	0.00640882	0.00442131	data	0
High shear stress-induced platelet activation	0	0	0	0	0	0	0	3.13e-05	9.57e-06	NA	0.0116173	data	0
Immune response_IL-11 signaling via JAK/STAT	0	0	0	0	0	0	0	3.17e-05	1.2e-08	7.09e-06	0.017912	data	0
Aryl hydrocarbon receptor signaling	0	0	0	0	0	0	0	3.61e-05	3.17e-06	0.00662045	0.000160619	data	0
Cell cycle_Influence of Ras and Rho proteins on G1/S Transition	0	0	0	0	0	0	0	3.61e-05	0.000245188	NA	0.00479033	data	0
Oxidative stress_ROS-mediated MAPK activation via canonical pathways	0	0	0	0	0	0	0	3.89e-05	NA	0.0138123	NA	data	0
Apoptosis and survival_TNF-alpha-induced ROS-dependent Caspase-3 signaling	0	0	0	0	0	0	0	3.89e-05	0.00095725	0.0138123	0.0019821	data	0
Immune response_LTBR1 signaling	0	0	0	0	0	0	0	3.89e-05	0.00815607	NA	NA	data	0
Aberrant lipid trafficking and metabolism in age-related macular degeneration pathogenesis	0	0	0	0	0	0	0	3.89e-05	4.81e-06	6.32e-05	1.34e-06	data	0
Histone deacetylases in Prostate Cancer	0	0	0	0	0	0	0	3.9e-05	1.99e-22	0.017389	NA	data	0
Signal transduction_HTR2A signaling outside the nervous system	0	0	0	0	0	0	0	3.94e-05	0.00743179	NA	0.023008	data	0
Development_Thrombopoietin signaling via ERK1/2 and PI3K	0	0	0	0	0	0	0	3.98e-05	3.49e-07	NA	0.00373652	data	0
Development_HGF signaling pathway	0	0	0	0	0	0	0	4.03e-05	5.91e-05	0.0375961	NA	data	0
Immune response_MIF - the neuroendocrine-macrophage connector	0	0	0	0	0	0	0	4.03e-05	0.000934299	0.00310756	0.000449697	data	0
Immune response_PGE2 in immune and neuroendocrine system interactions	0	0	0	0	0	0	0	4.03e-05	7.63e-08	0.0116269	9.67e-07	data	0
Mitogenic action of ESR1 (membrane) in breast cancer	0	0	0	0	0	0	0	4.03e-05	0.000934299	0.0116269	NA	data	0
TGF-beta signaling via SMADs in breast cancer	0	0	0	0	0	0	0	4.03e-05	1.61e-09	2.73e-05	0.000449697	data	0
Immune response_Neurotensin-induced activation of IL-8 in colonocytes	0	0	0	0	0	0	0	4.3e-05	0.0113589	NA	0.00716729	data	0
Development_VEGF-family signaling	0	0	0	0	0	0	0	4.3e-05	2.99e-07	0.0205515	0.00716729	data	0
Development_TGF-beta-dependent induction of EMT via SMADs	0	0	0	0	0	0	0	4.3e-05	7.44e-06	0.00215823	0.000531311	data	0
Cell cycle_ESR1 regulation of G1/S transition	0	0	0	0	0	0	0	4.3e-05	0.000961704	0.0366401	NA	data	0
Anti-apoptotic action of Gastrin in gastric cancer	0	0	0	0	0	0	0	4.3e-05	0.0389804	0.00215823	0.000531311	data	0
Dual role of TGF-beta 1 in HCC	0	0	0	0	0	0	0	4.45e-05	0.000178178	2.1e-06	5.81e-05	data	0
Tissue factor signaling in lung cancer	0	0	0	0	0	0	0	4.45e-05	0.00489765	NA	NA	data	0
Development_Alpha-1 adrenergic receptors signaling via Cyclic AMP	0	0	0	0	0	0	0	4.48e-05	0.00107638	NA	NA	data	0
Ethanol/Acetaldehyde-dependent stimulation of MMP-9 expression in HCC	0	0	0	0	0	0	0	4.48e-05	0.00592563	NA	0.00212633	data	0
DKK1 signaling in multiple myeloma	0	0	0	0	0	0	0	4.48e-05	0.000159265	0.0163622	NA	data	0
Role of histone modificators in progression of multiple myeloma	0	0	0	0	0	0	0	5.44e-05	6.82e-06	NA	NA	data	0
Activation of TGF-beta signaling in advanced colorectal cancer	0	0	0	0	0	0	0	5.44e-05	6.82e-06	0.00444836	0.00178126	data	0
Apoptosis and survival_BAD phosphorylation	0	0	0	0	0	0	0	5.6e-05	0.00424462	NA	0.00794119	data	0
Stem cells_NOTCH in inhibition of WNT/Beta-catenin-induced osteogenesis	0	0	0	0	0	0	0	5.6e-05	1.34e-10	0.0229316	0.0359401	data	0
Immune response_Role of DAP12 receptors in NK cells	0	0	0	0	0	0	0	5.65e-05	0.0039294	0.0260716	0.0237487	data	0
Nociception_Nociceptin receptor signaling	0	0	0	0	0	0	0	5.66e-05	0.00377188	0.0193472	0.00748131	data	0
IGF-1 signaling in pancreatic cancer	0	0	0	0	0	0	0	5.76e-05	5.83e-05	0.0111351	NA	data	0
Microsatellite instability in colorectal cancer	0	0	0	0	0	0	0	5.76e-05	1.07e-05	0.0407538	0.000621745	data	0
Statin action on the PI3K/ Akt pathway in COPD	0	0	0	0	0	0	0	5.76e-05	0.00122246	NA	NA	data	0
A synergy between NH(,3) and inflammation in pathogenesis of hepatic encephalopathy	0	0	0	0	0	0	0	5.76e-05	5.83e-05	0.00255818	8.54e-06	data	0
Glucocorticoid-induced elevation of intraocular pressure as glaucoma risk factor	0	0	0	0	0	0	0	5.87e-05	8.03e-06	NA	0.0102608	data	0
Metabolic syndrome X (general schema)	0	0	0	0	0	0	0	6.17e-05	0.000191582	7.43e-05	0.00920678	data	0
Fenofibrate in treatment of type 2 diabetes and metabolic syndrome X	0	0	0	0	0	0	0	6.48e-05	0.00137591	0.00166457	NA	data	0
Neurophysiological process_HTR2A signaling in the nervous system	0	0	0	0	0	0	0	6.5e-05	0.00138728	0.0448227	0.0150341	data	0
Blood coagulation_GPIb-IX-V-dependent platelet activation	0	0	0	0	0	0	0	6.75e-05	0.000568256	NA	NA	data	0
Cytoskeleton remodeling_Role of Activin A in cytoskeleton remodeling	0	0	0	0	0	0	0	6.96e-05	0.0015246	NA	NA	data	0
Role of Langerin+ dermal dendritic cells in contact hypersensitivity	0	0	0	0	0	0	0	6.96e-05	3.53e-06	0.000457651	2.16e-09	data	0
Stem cells_Putative pathways of telomerase regulation in glioblastoma stem cells	0	0	0	0	0	0	0	6.96e-05	0.00781178	NA	0.0206649	data	0
Regulation of caspase activity in Huntington's disease	0	0	0	0	0	0	0	6.96e-05	0.0015246	0.01961	NA	data	0
DNA damage_Inhibition of telomerase activity and cellular senescence	0	0	0	0	0	0	0	6.96e-05	0.00024396	NA	0.00259599	data	0
Development_YAP/TAZ-mediated co-regulation of transcription	0	0	0	0	0	0	0	7e-05	1.55e-09	0.0284776	0.00131783	data	0
ESR1 (membrane) 36 kDa isoform signaling in breast cancer	0	0	0	0	0	0	0	7.22e-05	0.000388192	0.02549	NA	data	0
HGF receptor (Met) and MSP receptor (RON) signaling pathways in SCLC	0	0	0	0	0	0	0	7.22e-05	6.42e-07	0.00172831	NA	data	0
Mechanisms of K-RAS addiction in lung cancer cells	0	0	0	0	0	0	0	7.48e-05	1.02e-05	0.00101577	0.000266542	data	0
Development_IGF-1 receptor signaling	0	0	0	0	0	0	0	8.16e-05	0.00529186	0.0161042	NA	data	0
CREB1-dependent transcription deregulation in Huntington's Disease	0	0	0	0	0	0	0	9.23e-05	0.000359062	0.0109818	0.00695755	data	0
WNT signaling in invasive-type melanoma cells	0	0	0	0	0	0	0	9.99e-05	0.000105939	0.00352653	0.00516297	data	0
Insulin-like growth factor family signaling in melanoma	0	0	0	0	0	0	0	9.99e-05	5.89e-07	0.00352653	0.0259891	data	0
Stem cells_Endothelial differentiation during embryonic development	0	0	0	0	0	0	0	0.000101887	8.93e-09	NA	NA	data	0
Sorafenib-induced inhibition of cell proliferation and angiogenesis in HCC	0	0	0	0	0	0	0	0.000102277	0.0124752	NA	0.0110841	data	0
HCV-dependent transcription regulation leading to HCC	0	0	0	0	0	0	0	0.000104882	0.000362237	0.000612076	0.00031717	data	0
Mechanisms of resistance to EGFR inhibitors in lung cancer	0	0	0	0	0	0	0	0.00011712	3.44e-05	NA	NA	data	0
Reproduction_Gonadotropin-releasing hormone (GnRH) signaling	0	0	0	0	0	0	0	0.000120183	0.00251035	NA	NA	data	0
Activation of Notch signaling in breast cancer	0	0	0	0	0	0	0	0.000129546	2.88e-05	0.000884899	NA	data	0
Dual role of p53 in transcription deregulation in Huntington's Disease	0	0	0	0	0	0	0	0.000132857	0.00309495	0.0231397	0.00475732	data	0
Deficient alpha-MSH signaling in melanoma	0	0	0	0	0	0	0	0.000135305	0.00244819	NA	NA	data	0
Regulation of GSK3 beta in bipolar disorder	0	0	0	0	0	0	0	0.000147396	0.000758804	0.000615258	NA	data	0
Stem cells_Dopamine-induced expression of CNTF in adult neurogenesis	0	0	0	0	0	0	0	0.000153657	0.00284428	0.0272252	0.0267209	data	0
Epigenetic alterations in ovarian cancer	0	0	0	0	0	0	0	0.000154163	3.48e-06	0.0012815	NA	data	0
Stem cells_Role of growth factors in the maintenance of embryonic stem cell pluripotency	0	0	0	0	0	0	0	0.000155635	0.0222431	0.00662045	NA	data	0
Proliferative action of Gastrin in gastric cancer	0	0	0	0	0	0	0	0.000155635	0.00283896	NA	0.00479033	data	0
LRRK2 in neuronal apoptosis in Parkinson's disease	0	0	0	0	0	0	0	0.000162254	0.00317569	NA	0.013166	data	0
Activation of Cortisol production in major depressive disorder	0	0	0	0	0	0	0	0.000166285	0.00077277	NA	0.0307266	data	0
Mitogenic action of Estradiol / ESR1 (nuclear) in breast cancer	0	0	0	0	0	0	0	0.000177118	0.0120844	NA	0.00909347	data	0
Autoantigens in Sjogren's syndrome	0	0	0	0	0	0	0	0.000178472	5.11e-06	NA	2.25e-09	data	0
Immune response_Sublytic effects of membrane attack complex	0	0	0	0	0	0	0	0.00018027	3.23e-05	0.00972796	0.000908149	data	0
Protein folding and maturation_Angiotensin system maturation	0	0	0	0	0	0	0	0.000228382	NA	3.37e-05	NA	data	0
Development_Transcriptional regulation of megakaryopoiesis	0	0	0	0	0	0	0	0.000232655	1.16e-06	NA	NA	data	0
Pro-oncogenic action of PTHrP in breast cancer	0	0	0	0	0	0	0	0.00023928	4.47e-06	0.000661603	0.000180857	data	0
Multiple myeloma (general schema)	0	0	0	0	0	0	0	0.000247787	9.93e-07	0.00203541	0.00171876	data	0
FGF2 in multiple myeloma	0	0	0	0	0	0	0	0.000247787	0.000738493	NA	NA	data	0
Immune response_PD-1-induced metabolic changes in T cells	0	0	0	0	0	0	0	0.000281376	0.00449594	0.0144953	NA	data	0
Development_Hedgehog and PTH signaling pathways in bone and cartilage development	0	0	0	0	0	0	0	0.00029997	3.86e-11	NA	0.0040709	data	0
Prolactin/ ERK signaling in breast cancer	0	0	0	0	0	0	0	0.00029997	5.83e-05	0.0111351	NA	data	0
Beta-catenin-dependent transcription regulation in colorectal cancer	0	0	0	0	0	0	0	0.00029997	3.88e-09	0.00255818	NA	data	0
Role of prenatal nicotine exposure in apoptosis and proliferation of pancreatic beta cells	0	0	0	0	0	0	0	0.000318501	9.38e-07	0.0199772	2.25e-05	data	0
Development_Transcription factors in segregation of hepatocytic lineage	0	0	0	0	0	0	0	0.000318501	0.000241679	NA	NA	data	0
Impaired inhibitory action of lipoxins and Resolvin E1 on neutrophil functions in CF	0	0	0	0	0	0	0	0.000333541	0.0014849	0.00715464	0.000255267	data	0
Apoptosis and survival_Anti-apoptotic action of Gastrin	0	0	0	0	0	0	0	0.000333541	0.0154746	0.02549	0.0387266	data	0
Nicotine signaling in dopaminergic neurons, Pt. 2 - axon terminal	0	0	0	0	0	0	0	0.000333541	0.0417137	NA	NA	data	0
Role of epigenetic alterations in survival and migration of SCLC cells	0	0	0	0	0	0	0	0.000333541	0.000388192	0.000363329	0.00877126	data	0
CCR7 signaling pathways in dendritic cells in allergic contact dermatitis	0	0	0	0	0	0	0	0.000338723	0.00179615	NA	0.00146454	data	0
Immune response_ETV3 affect on CSF1-promoted macrophage differentiation	0	0	0	0	0	0	0	0.00036618	0.000159265	NA	NA	data	0
Development_NOTCH-induced EMT	0	0	0	0	0	0	0	0.00036618	0.00107638	NA	0.0179546	data	0
Immune response _Sialic-acid receptors (Siglecs) signaling	0	0	0	0	0	0	0	0.000377018	0.000982615	0.00522203	NA	data	0
Deregulation of PSD-95-dependent signaling in Huntington's disease	0	0	0	0	0	0	0	0.000382804	0.0181393	0.0127072	NA	data	0
CHDI_Correlations from Discovery data_Causal network	0	0	0	0	0	0	0	0.000409908	0.00657153	0.0151649	NA	data	0
IGF signaling in lung cancer	0	0	0	0	0	0	0	0.000413942	5.13e-06	0.000435486	NA	data	0
Epithelial cell anoikis in COPD	0	0	0	0	0	0	0	0.000419084	1.74e-06	NA	0.000747372	data	0
Role of Nicotine-induced Leptin resistance in hypothalamus in development of obesity	0	0	0	0	0	0	0	0.00042134	0.00626721	0.00166457	NA	data	0
Canonical WNT signaling pathway in colorectal cancer	0	0	0	0	0	0	0	0.000450159	0.000267615	NA	NA	data	0
Apoptosis and survival_Anti-apoptotic action of membrane-bound ESR1	0	0	0	0	0	0	0	0.000483824	0.00047804	0.0144286	0.0259891	data	0
Development_Gastrin in differentiation of the gastric mucosa	0	0	0	0	0	0	0	0.000483824	0.00191664	0.0497888	0.000838047	data	0
Activation of Ca2+-dependent neuronal cell death in Huntington's disease	0	0	0	0	0	0	0	0.000483824	0.0211648	NA	NA	data	0
Development_Membrane-bound ESR1: interaction with growth factors signaling	0	0	0	0	0	0	0	0.000509973	0.00713646	NA	NA	data	0
Development_FGF2-dependent induction of EMT	0	0	0	0	0	0	0	0.000525851	0.00024396	0.01961	NA	data	0
HBV mediates angiogenesis in HCC	0	0	0	0	0	0	0	0.000525851	0.0015246	NA	NA	data	0
Role of neuropeptides in pathogenesis of SCLC	0	0	0	0	0	0	0	0.000529134	0.00101029	0.00884589	NA	data	0
Putative pathways for stimulation of fat cell differentiation by Bisphenol A	0	0	0	0	0	0	0	0.000542206	2.28e-06	NA	NA	data	0
Hedgehog signaling in pancreatic cancer	0	0	0	0	0	0	0	0.000542206	3.68e-08	3.06e-05	2.62e-07	data	0
Immune response_BAFF-induced non-canonical NF-kB signaling	0	0	0	0	0	0	0	0.000542206	8.62e-05	0.0062024	3.54e-05	data	0
Development_PACAP signaling in neural cells	0	0	0	0	0	0	0	0.000605989	0.000610749	NA	0.000135008	data	0
Development_Self-renewal and pluripotency maintenance of human embryonic stem cells	0	0	0	0	0	0	0	0.000694793	0.000575485	NA	0.0161758	data	0
Membrane-bound ESR1: interaction with G-proteins signaling	0	0	0	0	0	0	0	0.000729472	0.00105553	NA	NA	data	0
Development_Differentiation of white adipocytes	0	0	0	0	0	0	0	0.000729472	0.00105553	0.0238081	NA	data	0
Stem cells_Schema: Osteogenic and adipogenic differentiation of mesenchymal stem cells	0	0	0	0	0	0	0	0.000736336	9.46e-12	0.00423301	NA	data	0
Role of activation of WNT signaling in the progression of lung cancer	0	0	0	0	0	0	0	0.000742564	0.000568256	NA	NA	data	0
Inhibition of TGF-beta 1 signaling in early colorectal cancer	0	0	0	0	0	0	0	0.00075223	8.79e-05	0.000413143	0.0079787	data	0
Oxidative stress_Role of ASK1 under oxidative stress	0	0	0	0	0	0	0	0.000868265	0.0282257	NA	NA	data	0
Development_CNTF receptor signaling	0	0	0	0	0	0	0	0.000880668	0.010923	0.00841179	NA	data	0
Development_HGF-dependent inhibition of TGF-beta-induced EMT	0	0	0	0	0	0	0	0.000880668	0.0337918	0.0327923	NA	data	0
Regulation of beta-adrenergic receptors signaling in pancreatic cancer	0	0	0	0	0	0	0	0.000927092	0.00352075	NA	0.0332735	data	0
Cell cycle_Regulation of G1/S transition (part 2)	0	0	0	0	0	0	0	0.000982275	0.00307703	NA	NA	data	0
Stem cells_Astrocyte differentiation (general schema)	0	0	0	0	0	0	0	0.000982275	0.000669582	0.000525802	0.0498953	data	0
Platelet activation during ADAM-TS13-deficient thrombotic microangiopathy development	0	0	0	0	0	0	0	0.000982275	3.5e-07	0.0150329	0.00909347	data	0
Regulatory T cells in human allergic contact dermatitis	0	0	0	0	0	0	0	0.00104648	0.00205086	0.000246467	2.55e-05	data	0
Immune response_Lipoxins and Resolvin E1 inhibitory action on neutrophil functions	0	0	0	0	0	0	0	0.00110498	0.00378653	0.0366401	0.00359185	data	0
Role of Tissue factor in cancer independent of coagulation protease signaling	0	0	0	0	0	0	0	0.00110498	0.0130375	NA	NA	data	0
Neurogenesis_NGF/ TrkA MAPK-mediated signaling	0	0	0	0	0	0	0	0.0011313	0.00763484	NA	0.0132606	data	0
GLP-1 in inhibition of beta cell proliferation and function in type 2 diabetes	0	0	0	0	0	0	0	0.00113347	6.94e-05	NA	NA	data	0
EZH2 in Prostate Cancer	0	0	0	0	0	0	0	0.00126532	0.0146855	0.017389	NA	data	0
Immune response_Delta-type opioid receptor signaling in T-cells	0	0	0	0	0	0	0	0.00126532	0.000891877	NA	NA	data	0
Abnormalities in cell cycle in SCLC	0	0	0	0	0	0	0	0.00126532	0.000175593	NA	NA	data	0
Development_Adenosine A2B receptor signaling	0	0	0	0	0	0	0	0.00131249	0.000124556	NA	NA	data	0
TGF-beta 1-induced transactivation of membrane receptors signaling in HCC	0	0	0	0	0	0	0	0.00131249	0.000124556	0.0161042	0.00357295	data	0
Neurophysiological process_Corticoliberin signaling via CRHR1	0	0	0	0	0	0	0	0.00131249	0.00529186	0.0161042	0.0163075	data	0
Stem cells_Aberrant Wnt signaling in medulloblastoma stem cells	0	0	0	0	0	0	0	0.00135326	0.000737677	NA	NA	data	0
FGF signaling in gastric cancer	0	0	0	0	0	0	0	0.00135326	0.0160059	NA	NA	data	0
Apoptosis and survival_NO signaling in apoptosis	0	0	0	0	0	0	0	0.00135326	0.0160059	NA	NA	data	0
Cigarette smoke components TCDD and Benzo[a]pyrene and receptor AHR signaling in lung epithelial cells	0	0	0	0	0	0	0	0.00137332	1.07e-05	0.00255818	7.91e-05	data	0
Development_Notch Signaling Pathway	0	0	0	0	0	0	0	0.00137587	0.0014849	NA	NA	data	0
Nicotine / nAChR alpha-7 signaling in NSCLC	0	0	0	0	0	0	0	0.00137587	0.0417137	NA	NA	data	0
Hyaluronic acid/ CD44 signaling in cancer	0	0	0	0	0	0	0	0.00142263	0.0392158	0.0113512	NA	data	0
Stem cells_Hedgehog, BMP and Parathyroid hormone in osteogenesis	0	0	0	0	0	0	0	0.00155818	8.93e-09	NA	NA	data	0
Putative pathways of n-3 and n-6 fatty acids in obesity and type 2 diabetes	0	0	0	0	0	0	0	0.00155818	0.000157213	NA	0.0039497	data	0
Gamma-secretase regulation of angiogenesis	0	0	0	0	0	0	0	0.00160962	9.38e-07	NA	NA	data	0
Development_Beta-adrenergic receptors transactivation of EGFR	0	0	0	0	0	0	0	0.0016917	0.00153806	0.00301272	NA	data	0
Androgen signaling in HCC	0	0	0	0	0	0	0	0.00177929	0.000738493	0.0134739	0.000143788	data	0
Stem cells_CD30 signaling in transformed embryonic stem cells	0	0	0	0	0	0	0	0.00177929	0.00439428	NA	0.0154554	data	0
Hedgehog signaling in breast cancer	0	0	0	0	0	0	0	0.00178397	3.33e-08	0.00132399	0.00518249	data	0
Stem cells_Self-renewal of adult neural stem cells	0	0	0	0	0	0	0	0.00184022	8.08e-08	0.0196941	NA	data	0
IL-1 beta-dependent CFTR expression	0	0	0	0	0	0	0	0.00202403	0.000327384	NA	0.00207256	data	0
SHH signaling in colorectal cancer	0	0	0	0	0	0	0	0.00202403	1.89e-07	NA	0.00207256	data	0
Apoptosis and survival_NGF/ TrkA PI3K-mediated signaling	0	0	0	0	0	0	0	0.00219856	0.0240404	NA	NA	data	0
Immune response _CCR3 signaling in eosinophils	0	0	0	0	0	0	0	0.00219856	0.0240404	NA	NA	data	0
Induction of mucin secretion in airway goblet cells by purinergic receptors	0	0	0	0	0	0	0	0.00224104	NA	NA	0.00949994	data	0
Defective macrophage-mediated bacterial phagocytosis in COPD	0	0	0	0	0	0	0	0.00231388	4.05e-05	NA	NA	data	0
Inhibition of TGF-beta signaling in gastric cancer	0	0	0	0	0	0	0	0.00231388	0.00137591	0.00926753	0.00602666	data	0
Activation of pro-oncogenic TGF-beta potential in gastric cancer	0	0	0	0	0	0	0	0.00231388	5.48e-06	0.000245491	7.46e-05	data	0
IGF-1 receptor/EGFR cooperation in lung cancer	0	0	0	0	0	0	0	0.00231388	0.00626721	0.00926753	NA	data	0
Development_Endothelin-1/EDNRA transactivation of EGFR	0	0	0	0	0	0	0	0.00236567	0.00837946	NA	NA	data	0
DNA damage_ATM/ATR regulation of G1/S checkpoint	0	0	0	0	0	0	0	0.00251797	8.62e-05	NA	0.000319889	data	0
Stem cells_Cooperation between Hedgehog, IGF-2 and HGF signaling pathways in medulloblastoma stem cells	0	0	0	0	0	0	0	0.00251797	1.49e-05	0.0062024	0.0145493	data	0
Selective Insulin resistance in type 2 diabetes in liver	0	0	0	0	0	0	0	0.00251797	0.00746694	NA	NA	data	0
Renin-Angiotensin-Aldosterone System	0	0	0	0	0	0	0	0.00258683	NA	0.0460789	NA	data	0
Development_PIP3 signaling in cardiac myocytes	0	0	0	0	0	0	0	0.00280009	0.00978216	NA	NA	data	0
Immune response_Fc gamma R-mediated phagocytosis in macrophages	0	0	0	0	0	0	0	0.00280009	0.000934299	NA	NA	data	0
Canonical Notch signaling pathway in colorectal cancer	0	0	0	0	0	0	0	0.00280009	4.61e-07	0.0116269	NA	data	0
Chemotaxis_CCL2-induced chemotaxis	0	0	0	0	0	0	0	0.00294429	0.0282257	NA	NA	data	0
G-protein signaling_Ras family GTPases in kinase cascades	0	0	0	0	0	0	0	0.00295725	0.00182785	NA	NA	data	0
Role of IGH translocations in multiple myeloma	0	0	0	0	0	0	0	0.00301342	0.00289834	NA	NA	data	0
Normal and pathological TGF-beta-mediated regulation of cell proliferation	0	0	0	0	0	0	0	0.00310138	0.00244819	0.00150408	NA	data	0
Stem cells_Role of PKR1 and ILK in cardiac progenitor cells	0	0	0	0	0	0	0	0.00310138	0.0290835	NA	NA	data	0
SHH signaling in melanoma	0	0	0	0	0	0	0	0.00310138	2.15e-05	0.0292069	0.0161758	data	0
Stem cells_H3K36 demethylation in stem cell maintenance	0	0	0	0	0	0	0	0.00324821	0.00781178	NA	NA	data	0
Development_Negative regulation of WNT/Beta-catenin signaling in the nucleus	0	0	0	0	0	0	0	0.00335628	0.00729863	NA	NA	data	0
Development_Neurotrophin family signaling	0	0	0	0	0	0	0	0.0036002	0.000968883	0.00125092	0.0332735	data	0
Immune response_TLR2-induced platelet activation	0	0	0	0	0	0	0	0.0036002	0.000237915	NA	0.0332735	data	0
Activation of TGF-beta signaling in pancreatic cancer	0	0	0	0	0	0	0	0.00372901	0.0341789	0.000413143	0.0455237	data	0
Chemotaxis_CCR4-induced chemotaxis of immune cells	0	0	0	0	0	0	0	0.00378468	0.00306015	0.0327923	5.37e-05	data	0
Stem cells_Histone acetylation in embryonic stem cells	0	0	0	0	0	0	0	0.00378468	0.00306015	NA	NA	data	0
Nicotine / Beta-adrenergic signaling in lung cancer	0	0	0	0	0	0	0	0.00378468	0.010923	0.00841179	NA	data	0
Mechanism of action of CCR4 antagonists in asthma and atopic dermatitis (Variant 1)	0	0	0	0	0	0	0	0.00378468	0.00306015	0.0327923	5.37e-05	data	0
Oxidative stress_ROS-mediated activation of MAPK via inhibition of phosphatases	0	0	0	0	0	0	0	0.00378468	0.010923	NA	NA	data	0
CCR4-dependent immune cell chemotaxis in asthma and atopic dermatitis	0	0	0	0	0	0	0	0.00378468	0.00306015	0.0327923	5.37e-05	data	0
Transcription_Epigenetic regulation of gene expression	0	0	0	0	0	0	0	0.00393878	0.00179615	NA	NA	data	0
Inhibition of tumor suppressive pathways in pancreatic cancer	0	0	0	0	0	0	0	0.00425296	0.00210578	0.0232281	0.0235871	data	0
Development_Role of HGF in hematopoietic stem cell mobilization	0	0	0	0	0	0	0	0.00425296	6.17e-06	NA	NA	data	0
Development_Growth hormone signaling via PI3K/AKT and MAPK cascades	0	0	0	0	0	0	0	0.00427294	6.94e-05	0.0229316	0.0359401	data	0
Cell adhesion_Integrin inside-out signaling	0	0	0	0	0	0	0	0.00452767	2.8e-06	NA	0.0291164	data	0
Development_Regulation of CDK5 in CNS	0	0	0	0	0	0	0	0.00464459	0.0120844	0.0150329	0.00909347	data	0
Development_Growth factors in regulation of oligodendrocyte progenitor cell proliferation	0	0	0	0	0	0	0	0.00502384	9.49e-05	5.12e-08	NA	data	0
FGF signaling in Prostate Cancer	0	0	0	0	0	0	0	0.00503981	0.0050809	NA	NA	data	0
Cytoskeleton remodeling_Hyaluronic acid/ CD44 signaling pathways	0	0	0	0	0	0	0	0.00503981	NA	0.02549	NA	data	0
Oxidative stress_Activation of NADPH oxidase	0	0	0	0	0	0	0	0.00518434	0.0434539	NA	NA	data	0
Transition of Monoclonal gammopathy of undetermined significance to active multiple myeloma (schema)	0	0	0	0	0	0	0	0.00546972	8.04e-05	0.000100198	0.0267209	data	0
Stem cells_Notch signaling in medulloblastoma stem cells	0	0	0	0	0	0	0	0.00571981	3e-05	NA	NA	data	0
Stem cells_Role of Neuregulin 1 and Thymosin beta-4 in myocardium regeneration after infarction	0	0	0	0	0	0	0	0.00571981	0.000891877	NA	NA	data	0
Development_Activation of Erk by ACM1, ACM3 and ACM5	0	0	0	0	0	0	0	0.00590922	5.13e-06	NA	0.00965941	data	0
Development_Delta-type opioid receptor mediated cardioprotection	0	0	0	0	0	0	0	0.00654351	0.00563867	NA	NA	data	0
Role of cell adhesion molecules in progression of pancreatic cancer	0	0	0	0	0	0	0	0.00688977	7.05e-06	NA	0.0446603	data	0
Retinoic acid maintains mucocilliary differentiation and mucins expression in normal and asthmatic airway epithelium	0	0	0	0	0	0	0	0.00697074	0.00490544	0.0199772	0.000220441	data	0
Development_Osteopontin signaling in osteoclasts	0	0	0	0	0	0	0	0.00697074	4.34e-05	NA	NA	data	0
HDL dyslipidemia in type 2 diabetes and metabolic syndrome X	0	0	0	0	0	0	0	0.00773737	0.00679378	0.000737284	0.000113658	data	0
Regulation of AKT(PKB)/ GSK3 beta cascade in bipolar disorder	0	0	0	0	0	0	0	0.00790701	NA	0.000106761	NA	data	0
Transcription_Sirtuin6 regulation and functions	0	0	0	0	0	0	0	0.00859537	0.0120307	NA	NA	data	0
Stem cells_Schema: FGF signaling in embryonic stem cell self-renewal and differentiation	0	0	0	0	0	0	0	0.00921947	1.29e-05	NA	0.0126905	data	0
Inhibition of remyelination in multiple sclerosis: role of cell-cell and ECM-cell interactions	0	0	0	0	0	0	0	0.00921947	0.000246942	4.46e-06	0.0126905	data	0
Inhibition of LKB1 / AMPK signaling in breast cancer	0	0	0	0	0	0	0	0.0100643	NA	0.0258796	NA	data	0
Rb proteins signaling in multiple myeloma	0	0	0	0	0	0	0	0.0102073	0.00439428	NA	NA	data	0
Development_Role of Thyroid hormone in regulation of oligodendrocyte differentiation	0	0	0	0	0	0	0	0.0105864	0.0113569	0.0411092	NA	data	0
Development_Astrocyte differentiation from adult stem cells	0	0	0	0	0	0	0	0.0106063	0.00963833	0.0010553	NA	data	0
Stem cells_Response to hypoxia in glioblastoma stem cells	0	0	0	0	0	0	0	0.0106063	1.28e-06	NA	0.0307266	data	0
Stem cells_FGF2-induced self-renewal of adult neural stem cells	0	0	0	0	0	0	0	0.0106063	0.0282538	NA	NA	data	0
Cell adhesion_IL-8 family-dependent cell migration and adhesion	0	0	0	0	0	0	0	0.0106063	3.9e-05	0.0183447	1.96e-05	data	0
Apoptosis and survival_Apoptotic Activin A signaling	0	0	0	0	0	0	0	0.0106318	NA	NA	0.0373835	data	0
Dual role of BMP signaling in gastric cancer	0	0	0	0	0	0	0	0.0106318	0.0239534	NA	NA	data	0
HSP70 and HSP40-dependent folding in Huntington's disease	0	0	0	0	0	0	0	0.0106318	0.0239534	0.0415439	NA	data	0
Immune response_Distinct metabolic pathways in naive and effector CD8+ T cells	0	0	0	0	0	0	0	0.0111728	0.00743179	NA	NA	data	0
Cytoskeleton remodeling_FAK signaling	0	0	0	0	0	0	0	0.0115645	0.00179615	NA	NA	data	0
Gamma-Secretase regulation of neuronal cell development and function	0	0	0	0	0	0	0	0.0115645	0.0144071	4.24e-10	0.0068556	data	0
Signal transduction_Activin A signaling regulation	0	0	0	0	0	0	0	0.0119389	NA	0.0292069	NA	data	0
Signal transduction_IP3 signaling	0	0	0	0	0	0	0	0.0121001	0.0131162	NA	NA	data	0
Development_Muscle progenitor cell migration in hypaxial myogenesis	0	0	0	0	0	0	0	0.0123048	0.0113589	NA	NA	data	0
Development_Regulation of lung epithelial progenitor cell differentiation	0	0	0	0	0	0	0	0.0123048	0.000968883	NA	NA	data	0
Development_S1P2 and S1P3 receptors in cell proliferation and differentiation	0	0	0	0	0	0	0	0.0129341	NA	0.0109818	0.041352	data	0
Gamma-secretase proteolytic targets	0	0	0	0	0	0	0	0.0137072	0.00140099	1.09e-08	NA	data	0
Immune response_IL-13 signaling via PI3K-ERK pathway	0	0	0	0	0	0	0	0.0137693	NA	0.0487389	NA	data	0
Development_Epigenetic and transcriptional regulation of oligodendrocyte precursor cell differentiation and myelination	0	0	0	0	0	0	0	0.014053	0.000748322	NA	NA	data	0
Hypoxia-induced EMT in cancer and fibrosis	0	0	0	0	0	0	0	0.0146584	0.00464861	NA	NA	data	0
Development_Oligodendrocyte differentiation from adult stem cells	0	0	0	0	0	0	0	0.015603	0.000589302	6.15e-05	NA	data	0
CCL2 in Prostate Cancer	0	0	0	0	0	0	0	0.0162297	0.0324809	0.00337088	NA	data	0
Effect of H. pylori infection on gastric epithelial cells motility	0	0	0	0	0	0	0	0.0162871	0.0154746	NA	0.0387266	data	0
Regulation of metabolism_Role of Adiponectin in regulation of metabolism	0	0	0	0	0	0	0	0.0162871	0.0154746	NA	NA	data	0
Prostaglandins and leukotrienes-mediated induction of expression of mucins in normal and asthmatic epithelium	0	0	0	0	0	0	0	0.0162871	0.0154746	NA	0.0387266	data	0
Pro-oncogenic action of Androgen receptor in breast cancer	0	0	0	0	0	0	0	0.0164216	0.00378653	NA	NA	data	0
Development_Delta-type opioid receptor signaling via G-protein alpha-14	0	0	0	0	0	0	0	0.0185422	0.0402046	NA	NA	data	0
The role of aberrations in CDKN2 locus and CDK4 in familial melanoma	0	0	0	0	0	0	0	0.0185422	0.000669582	NA	NA	data	0
Development_Flt3 signaling	0	0	0	0	0	0	0	0.0185933	0.00181676	NA	NA	data	0
CHDI_Correlations from Discovery data_Causal network (positive)	0	0	0	0	0	0	0	0.0190591	1.07e-05	0.0407538	0.0040709	data	0
HBV regulation of DNA repair and apoptosis leading to HCC	0	0	0	0	0	0	0	0.0192839	0.0346429	NA	0.00753004	data	0
Probable BMP4-mediated induction of EMT in airway epithelium	0	0	0	0	0	0	0	0.0199725	0.0100942	NA	NA	data	0
Role of ZNF202 in regulation of expression of genes involved in atherosclerosis	0	0	0	0	0	0	0	0.0199725	0.0100942	0.0232281	0.0235871	data	0
Proteolysis_Putative SUMO-1 pathway	0	0	0	0	0	0	0	0.0218872	0.000891877	NA	0.00152113	data	0
Cell adhesion_Role of tetraspanins in the integrin-mediated cell adhesion	0	0	0	0	0	0	0	0.0219794	0.0181393	NA	NA	data	0
Development_MAG-dependent inhibition of neurite outgrowth	0	0	0	0	0	0	0	0.0219794	NA	0.00301272	NA	data	0
Role of Thyroid hormone in regulation of oligodendrocyte differentiation in multiple sclerosis	0	0	0	0	0	0	0	0.0247523	0.0110713	NA	NA	data	0
Cell cycle_Regulation of G1/S transition (part 1)	0	0	0	0	0	0	0	0.0251954	0.00191664	0.0144286	NA	data	0
WNT signaling in proliferative-type melanoma cells	0	0	0	0	0	0	0	0.0251954	0.00191664	0.00352653	NA	data	0
NRSF-dependent transcription deregulation in Huntington's Disease	0	0	0	0	0	0	0	0.0287189	8.76e-07	0.000884899	NA	data	0
VLDL, LDL dyslipidemia in type 2 diabetes and metabolic syndrome X	0	0	0	0	0	0	0	0.0287189	0.0245307	NA	NA	data	0
Development_Delta- and kappa-type opioid receptors signaling via beta-arrestin	0	0	0	0	0	0	0	0.0290478	0.000121285	NA	NA	data	0
Cytoskeleton remodeling_ESR1 action on cytoskeleton remodeling and cell migration	0	0	0	0	0	0	0	0.0290478	0.000737677	NA	NA	data	0
Mechanism of Maraviroc action in HIV Infections	0	0	0	0	0	0	0	0.0325386	0.0454512	0.0158546	0.00513006	data	0
Transcription_Role of heterochromatin protein 1 (HP1) family in transcriptional silencing	0	0	0	0	0	0	0	0.032561	0.00289834	NA	NA	data	0
WNT signaling in HCC	0	0	0	0	0	0	0	0.032561	0.0282538	NA	NA	data	0
Stem cells_FGF signaling in pancreatic and hepatic differentiation of embryonic stem cells	0	0	0	0	0	0	0	0.032561	0.00289834	NA	NA	data	0
Inhibition of Vitamin D pathway in Prostate Cancer	0	0	0	0	0	0	0	0.032561	3.9e-05	0.000203305	0.0307266	data	0
Development_Dopamine D2 receptor transactivation of EGFR	0	0	0	0	0	0	0	0.0344195	0.0197087	NA	NA	data	0
Cell adhesion_Role of CDK5 in cell adhesion	0	0	0	0	0	0	0	0.0370869	0.00980247	NA	NA	data	0
DNA damage_Role of SUMO in p53 regulation	0	0	0	0	0	0	0	0.0380893	0.01635	NA	NA	data	0
Prolactin signaling in Prostate Cancer	0	0	0	0	0	0	0	0.0392528	0.00907293	0.0292069	NA	data	0
Transcription_Negative regulation of HIF1A function	0	0	0	0	0	0	0	0.0395628	0.000459014	NA	NA	data	0
Gamma-secretase regulation of gastrointestinal epithelial cell development	0	0	0	0	0	0	0	0.0403664	0.000255646	NA	NA	data	0
Development_TGF-beta family mediated differentiation of embryonic stem cells	0	0	0	0	0	0	0	0.0412388	0.00424462	NA	NA	data	0
Nicotine signaling in cholinergic neurons	0	0	0	0	0	0	0	0.0458992	NA	0.0196941	NA	data	0
POMC, alpha-MSH and AGRP in regulation of food intake and energy expenditure in obesity in hypothalamus	0	0	0	0	0	0	0	0.0460905	0.0154746	NA	NA	data	0
Nicotine / nAChR alpha-3/nAChR beta-2 signaling in NSCLC	0	0	0	0	0	0	0	0.0468979	0.0287686	NA	NA	data	0
Hedgehog signaling in prostate cancer	0	0	0	0	0	0	0	0.0468979	0.000359062	0.0471007	0.041352	data	0
Pioglitazone and Rosiglitazone in treatment of type 2 diabetes and metabolic syndrome X	0	0	0	0	0	0	0	0.0468979	0.00182785	0.0109818	0.041352	data	0
Development_Schema: Embryonal myogenesis	0	0	0	0	0	0	0	NA	0.00309495	NA	0.048191	data	0
Chemotaxis_Inhibitory action of lipoxins on IL-8- and Leukotriene B4-induced neutrophil migration	0	0	0	0	0	0	0	NA	0.0222431	NA	0.000945524	data	0
Growth factors in regulation of oligodendrocyte precursor cells proliferation in multiple sclerosis	0	0	0	0	0	0	0	NA	0.00105553	0.000106761	NA	data	0
Gamma-secretase regulation of mammary cell development	0	0	0	0	0	0	0	NA	0.00210578	6.86e-06	0.00313218	data	0
Development_Retinoic acid and retinoic acid receptors in regulation of oligodendrocyte differentiation	0	0	0	0	0	0	0	NA	0.00563867	0.0127072	NA	data	0
Inhibition of remyelination in multiple sclerosis: regulation of cytoskeleton proteins	0	0	0	0	0	0	0	NA	0.00604094	0.000435486	NA	data	0
TMPRSS2-ERG fusion in Prostate Cancer	0	0	0	0	0	0	0	NA	0.0235618	NA	0.0478072	data	0
Notch signaling in oligodendrocyte precursor cell differentiation in multiple sclerosis	0	0	0	0	0	0	0	NA	0.000494662	0.0025405	NA	data	0
Development_Neural stem cell lineage commitment (schema)	0	0	0	0	0	0	0	NA	0.00679378	3.94e-08	NA	data	0
Retinoic acid regulation of oligodendrocyte differentiation in multiple sclerosis	0	0	0	0	0	0	0	NA	0.0197087	0.00132399	NA	data	0
WNT signaling in gastric cancer	0	0	0	0	0	0	0	NA	0.0154365	0.0111351	NA	data	0
Stem cells_Extraembryonic differentiation of embryonic stem cells	0	0	0	0	0	0	0	NA	0.000961704	0.0366401	NA	data	0
Degranulation of lung mast cells	0	0	0	0	0	0	0	NA	0.000149527	0.0495635	NA	data	0
Transport_HDL-mediated reverse cholesterol transport	0	0	0	0	0	0	0	NA	NA	0.0229316	0.00794119	data	0
Role of SHH and Notch in SCLC	0	0	0	0	0	0	0	NA	6.82e-06	0.0199772	NA	data	0
Stem cells_Generation of pancreatic beta-cells from embryonic stem cells (late stages)	0	0	0	0	0	0	0	NA	0.00052328	0.0272252	NA	data	0
Putative pathways of hormone action in neurofibromatosis type 1	0	0	0	0	0	0	0	NA	0.00626721	0.0415439	NA	data	0
Development_WNT/Beta-catenin signaling in cell differentiation	0	0	0	0	0	0	0	NA	0.0120844	NA	0.0498953	data	0
